2 **Title of article:** Role of Cytosolic, Tyrosine-Insensitive Prephenate Dehydrogenase in  
3 *Medicago truncatula*

4

5

6 **Authors:** Craig A. Schenck<sup>1,2</sup>, Josh Westphal<sup>1</sup>, Dhileepkumar Jayaraman<sup>3</sup>, Kevin Garcia<sup>3,4</sup>,

7 Jiangqi Wen<sup>5</sup>, Kirankumar S. Mysore<sup>5</sup>, Jean-Michel Ané<sup>3,6</sup>, Lloyd W. Sumner<sup>7,8</sup> and Hiroshi A.

8 Maeda<sup>1,\*</sup>

9

10

11 **Affiliations:** <sup>1</sup>Department of Botany, University of Wisconsin-Madison, Madison, WI 53706

12 <sup>2</sup> Current address: Department of Biochemistry and Molecular Biology, Michigan State  
13 University, East Lansing, MI 48824

14 <sup>3</sup> Department of Bacteriology, University of Wisconsin-Madison, Madison, WI 53706

15 <sup>4</sup> Department of Crop and Soil Sciences, North Carolina State University, Raleigh, NC 27695

16 <sup>5</sup> Noble Research Institute, LLC., Ardmore, OK, USA

17 <sup>6</sup> Department of Agronomy, University of Wisconsin-Madison, Madison, WI 53706

18 <sup>7</sup> Department of Biochemistry, University of Missouri, Columbia, MO 65211

19 <sup>8</sup> Metabolomics and Bond Life Sciences Centers, University of Missouri, Columbia, MO 65211

20

21

22

23 <sup>\*</sup>Corresponding author: Hiroshi A. Maeda (maeda2@wisc.edu)

24

25

26

27 **ABSTRACT**

28 L-Tyrosine (Tyr) is an aromatic amino acid synthesized *de novo* in plants and microbes  
29 downstream of the shikimate pathway. In plants, Tyr and a Tyr pathway intermediate,  
30 4-hydroxyphenylpyruvate (HPP), are precursors to numerous specialized metabolites, which are  
31 crucial for plant and human health. Tyr is synthesized in the plastids by a TyrA family enzyme,  
32 arogenate dehydrogenase (ADH/TyrA<sub>a</sub>), which is feedback inhibited by Tyr. In addition to ADH  
33 enzymes, many legumes possess prephenate dehydrogenases (PDH/TyrA<sub>p</sub>), which are insensitive  
34 to Tyr and localized to the cytosol. Yet the role of PDH in legumes is currently unknown. This  
35 study isolated and characterized *Tnt1*-transposon mutants of *MtPDH1* (*pdh1*) in *Medicago*  
36 *truncatula* to investigate PDH function. The *pdh1* mutants lacked *PDH* transcript, PDH activity,  
37 and displayed little aberrant morphological phenotypes under standard growth conditions  
38 providing genetic evidence that *MtPDH1* is responsible for the PDH activity detected in *M.*  
39 *truncatula*. Though plant PDH enzymes and activity have been specifically found in legumes,  
40 nodule number and nitrogenase activity of *pdh1* mutants were not significantly reduced  
41 compared to wild-type (Wt) during symbiosis with nitrogen-fixing bacteria. Although Tyr levels  
42 were not significantly different between Wt and mutants under standard conditions, when carbon  
43 flux was increased by shikimate precursor feeding, mutants accumulated significantly less Tyr  
44 than Wt. These data suggest that *MtPDH1* is involved in Tyr biosynthesis when the shikimate  
45 pathway is stimulated, and possibly linked to unidentified legume-specific specialized  
46 metabolism.

## 47 INTRODUCTION

48 L-Tyrosine (Tyr) is an aromatic amino acid synthesized *de novo* in plants and microbes,  
49 but not animals; thus, humans must acquire Tyr through their diet or by enzymatic conversion of  
50 L-phenylalanine (Phe, Fitzpatrick, 1999). In addition to its involvement in protein synthesis, Tyr  
51 and a Tyr-pathway intermediate 4-hydroxyphenylpyruvate (HPP) are the precursors to numerous  
52 specialized metabolites crucial for plant and animal health (Schenck and Maeda, 2018).  
53 Tyr-derived plant specialized metabolites have roles as photosynthetic electron carriers  
54 (plastoquinone, Metz et al., 1989), pollinator attractors (betalain pigments, Strack et al., 2003)  
55 and in defense (dhurrin and rosmarinic acid, Møller, 2010; Petersen, 2013). In grasses, Tyr also  
56 serves as a precursor to lignin, the main structural polymer in plants (Higuchi et al., 1967; Rosler  
57 et al., 1997; Barros et al., 2016). Humans have co-opted some of these natural products to serve  
58 nutritional and medicinal roles such as some benzylisoquinoline alkaloids, which have  
59 antitussive, analgesic, and antimicrobial activities (Barken et al., 2008; Beaudoin and Facchini,  
60 2014; Kries and O'Connor, 2016), and the antioxidant properties of tocopherols (collectively  
61 referred to as vitamin E, Bramley et al., 2000).

62 The aromatic amino acids (AAAs; Tyr, Phe, and tryptophan [Trp]) are synthesized in the  
63 plastids from chorismate, the final product of the shikimate pathway (Tzin and Galili, 2010;  
64 Maeda and Dudareva, 2012). Chorismate mutase (CM, EC number 5.4.99.5) catalyzes the  
65 committed step of Tyr and Phe synthesis — the isomerization of chorismate into prephenate  
66 (Goers and Jensen, 1984; Kuroki and Conn, 1989; Eberhard et al., 1996; Mobley et al., 1999).  
67 Prephenate is converted to Tyr via two reactions, oxidative decarboxylation catalyzed by a TyrA  
68 dehydrogenase enzyme and transamination. These reactions can occur in either order, leading to  
69 alternative Tyr pathways (**Fig. 1**, Schenck and Maeda, 2018). In most microbes, a  
70 prephenate-specific TyrA dehydrogenase (PDH/TyrA<sub>p</sub> EC 1.3.1.13, **Fig. 1**) first converts

71 prephenate into HPP followed by transamination to Tyr via Tyr-aminotransferase (Tyr-AT or  
72 TyrB, EC2.6.1.5). In plants, these reactions occur in the reverse order with transamination of  
73 prephenate to form aroenate by a plastidic prephenate aminotransferase (PPA-AT, EC 2.6.1.78),  
74 followed by oxidative decarboxylation catalyzed by a plastidic aroenate-specific TyrA  
75 dehydrogenase (ADH/TyrA<sub>a</sub> EC 1.3.1.78) producing Tyr (**Fig. 1**). The ADH-mediated Tyr  
76 pathway appears to be essential for normal growth and development in plants as indicated by the  
77 severe phenotype of *Arabidopsis thaliana adh2/tyra2* knockout mutant, which was further  
78 exacerbated by transient suppression of the other *ADH1/TyrA1* gene (de Oliveira et al., 2019).  
79 PDH and ADH are the key enzymes in their respective pathways, as they compete for substrates  
80 that are shared with Phe biosynthesis, and are generally feedback inhibited by Tyr (Rubin and  
81 Jensen, 1979; Gaines et al., 1982; Connelly and Conn, 1986; Rippert and Matringe, 2002).

82 PDH activity, which is commonly found in microbes, has been detected in tissue extracts  
83 of some plants, all restricted to the legume family (Gamborg and Keeley, 1966; Rubin and  
84 Jensen, 1979; Siehl, 1999). In soybean, leaf tissue had the highest PDH activity of all analyzed  
85 tissues (Schenck et al., 2015). Phylogenetic analyses of plant and microbial TyrAs showed that  
86 *PDH* genes are uniquely present in legumes, suggesting that legume PDH enzymes are the result  
87 of a recent legume-specific gene duplication event of a plant *ADH* rather than horizontal gene  
88 transfer from a *PDH*-possessing rhizobia (Schenck et al., 2015). However, not all legumes  
89 possess *PDH*, which suggests gene loss in some legumes (Schenck et al., 2015; Schenck et al.,  
90 2017a). PDH recombinant enzymes from *Glycine max* (soybean; GmPDH1 and GmPDH2) and  
91 *Medicago truncatula* (Medicago; MtPDH1) preferred prephenate over aroenate as their  
92 substrates (Schenck et al., 2015; Schenck et al., 2017a) and, unlike plant ADH enzymes, were  
93 insensitive to Tyr inhibition and localized to the cytosol (Schenck et al., 2015; Schenck et al.,  
94 2017a). These recently diverged plant ADH and PDH enzymes were used to identify a single

95 amino acid residue (Asn222 of GmPDH1) of TyrA dehydrogenases that switches TyrA substrate  
96 specificity and underlies the evolution of legume PDH enzymes (Schenck et al., 2017a; Schenck  
97 et al., 2017b). While these biochemical and evolutionary studies established that some legumes  
98 have an alternative Tyr-insensitive cytosolic PDH enzyme, its *in vivo* function is unknown.

99 To address this issue, we hypothesized and tested four non-mutually exclusive *in planta*  
100 functions of the PDH enzyme in legumes. **Hypothesis I: PDH functions as a part of a**  
101 **redundant Tyr biosynthetic pathway in the cytosol (Fig. 1).** Although AAA biosynthesis is  
102 localized to the plastids (Bickel et al., 1978; Jung et al., 1986), some plants including legumes  
103 identified cytosolic isoforms of CM and Tyr-AT, which catalyze immediately up- and  
104 down-stream steps of PDH and complete the cytosolic Tyr biosynthetic pathway from chorismate  
105 (Fig. 1) (D'Amato et al., 1984; Eberhard et al., 1996; Ding et al., 2007; Schenck et al., 2015;  
106 Wang et al., 2016). Also, a cytosolic Phe pathway was recently identified in plants (Yoo et al.,  
107 2013; Qian et al., 2019). **Hypothesis II: PDH is involved in the production of Tyr or**  
108 **HPP-derived metabolite(s) (Fig. 1).** Tyr is the precursor of many plant specialized metabolites  
109 (Schenck and Maeda, 2018) and duplicated primary metabolic enzymes can be co-opted to  
110 efficiently provide Tyr and HPP precursors to support their downstream specialized metabolism  
111 (Weng et al., 2012; Moghe and Last, 2015; Maeda, 2019). **Hypothesis III: PDH is involved in**  
112 **the Tyr catabolism pathway to the tricarboxylic acid (TCA) cycle.** Tyr catabolism proceeds  
113 through HPP, the product of PDH, and feeds intermediates (e.g. fumarate) of the TCA cycle (Fig.  
114 1). Thus, HPP produced from PDH may be directly incorporated into the Tyr degradation  
115 pathway. **Hypothesis IV: PDH is involved in the legume-rhizobia symbiosis.** Many legumes  
116 form a symbiotic relationship with rhizobia, and PDH activity is uniquely present in legumes.  
117 Furthermore, *MtPDH1* expression is upregulated in the nodules after treatment with nitrate  
118 ( $\text{NO}_3^-$ , Benedito et al., 2008) or phosphinothricin (PPT, Seabra et al., 2012), both of which

119 stimulate nodule senescence (Streeter and Wong, 1988; Matamoros et al., 1999; Pérez Guerra et  
120 al., 2010). To systematically test the above four hypotheses, this study isolated and characterized  
121 *pdh* mutants in the model plant *M. truncatula*, which conveniently has a single *PDH* gene  
122 compared with some other legumes that have multiple copies (Schenck et al., 2015; Schenck et  
123 al., 2017a) using genetics, biochemistry, metabolomics, histochemical staining, microscopy, and  
124 gene expression analyses.

125

126

## 127 **RESULTS**

### 128 ***Isolation of pdh mutants in Medicago truncatula***

129 To investigate the *in vivo* function of PDH in legumes, two independent homozygous alleles of  
130 *Tnt1*-transposon mutants of *M. truncatula* (Tadege et al., 2008) were identified for the *MtPDH1*  
131 locus (Mt3g071980) (Cheng et al., 2014). The *pdh1-1* and *pdh1-2* mutants carried a transposon  
132 insertion in the first and last exons of the *MtPDH1* gene, respectively (**Fig. 2a**). *MtPDH1* was  
133 constitutively expressed across many tissues and under various conditions with the highest and  
134 lowest expression being detected in aerial tissues and seeds, respectively (**Supplementary Fig.**  
135 **1**). Both alleles did not produce any *PDH* transcript in the leaves (**Fig. 2b**). The *M. truncatula*  
136 genome contains two *ADH* genes, *MtADH* (Mt4g115980) and *MtncADH* (Mt5g083530)  
137 (Schenck et al., 2017a), but neither were enhanced in the *pdh1* mutants (**Fig. 2b**). Consistent with  
138 their transcript levels, PDH activity was almost completely abolished in both *pdh1* mutants  
139 without significant reduction in ADH activity (**Fig. 2c**). After six weeks of growth, *pdh1-1*  
140 showed no phenotypic difference from wild-type (Wt; R108). The *pdh1-2* mutant, on the other  
141 hand, had a slight bushy phenotype, which could be due to an unknown secondary transposon  
142 insertion(s) (**Fig. 2d**); however, multiple attempts of backcrossing were unsuccessful. These data  
143 provide genetic evidence that *MtPDH* is responsible for the PDH activity detected in *M.*  
144 *truncatula*. The minor impacts of eliminating PDH activity on overall plant growth in two  
145 independent *pdh1* mutants suggests that the PDH enzyme is not essential during standard growth  
146 conditions in *M. truncatula*.

147

### 148 ***Tyr and Tyr-derived compounds are unaltered in pdh mutants during standard growth*** 149 ***condition***

150 To test the hypothesis that the PDH pathway serves as a redundant Tyr biosynthetic route

151 **(hypothesis I)**, Tyr and Tyr/HPP-derived compounds were analyzed in Wt and mutants.  
152 Metabolites were extracted from root and leaf tissue of 6-week-old plants grown under standard  
153 conditions. Surprisingly, the levels of Tyr were not significantly different between Wt and  
154 mutants in either leaf or root tissue (**Fig. 3a**). Additionally, the levels of Phe and Trp in the leaves  
155 and roots were not significantly reduced in mutants as compared to Wt, though a slightly higher  
156 Trp level was observed in *pdh1-2* (**Fig. 3a**). Potential effects on tocopherols, HPP-derived  
157 metabolites, were also tested (**hypothesis II**), but their levels were not significantly different  
158 between Wt and mutants in both leaf and root tissue (**Fig. 3b**). We also performed non-targeted  
159 analysis using GC-MS for both polar and non-polar metabolites; however, no consistent  
160 differences were observed between Wt and mutants (**Supplementary Table 1**). Together, these  
161 data suggest that under standard growth conditions, the lack of the PDH enzyme had no  
162 substantial effects on the overall accumulation of aromatic amino acids (AAAs) or  
163 Tyr/HPP-derived metabolites analyzed.

164 In grasses, upwards of 50% of the total lignin is derived from Tyr, via a Tyr  
165 ammonia-lyase (TAL) enzyme (Barros et al., 2016). Since TAL activity has also been detected in  
166 some non-grass species, including legumes (Giebel, 1973; Beaudoin-Eagan and Thorpe, 1985;  
167 Khan et al., 2003), the legume PDH enzyme may synthesize Tyr that is directly incorporated into  
168 the phenylpropanoid pathway for downstream products such as lignin (**hypothesis II**). To test  
169 this possibility, stem cross-sections from Wt and mutants were stained using two different  
170 techniques, Mäule and phloroglucinol, which can detect potential differences in composition or  
171 linkages of lignin (Mitra and Loqué, 2014, Pomar et al., 2002). Neither staining method showed  
172 any obvious differences in stem lignification between Wt and mutants (**Supplementary Fig.**  
173 **2a,b**). When phenylpropanoid intermediates, *p*-coumarate and ferulate, involved in lignin  
174 biosynthesis were analyzed by GCMS, they were somewhat reduced in *pdh1-2* but not



175 consistently in *pdh1-1* (**Supplementary Fig. 2c**). Thus, the lack of PDH does not have  
176 substantial impacts on lignin biosynthesis in *M. truncatula*.

177

178 ***Less tocopherols are accumulated in pdh1 than Wt under high light treatment.***

179 Under various biotic and abiotic stresses, the shikimate pathway is induced, which often leads to  
180 accumulation of AAAs (Dyer et al., 1989; Gilbert et al., 1998; Zhao et al., 1998; Betz et al.,  
181 2009). To test the potential role of PDH in Tyr biosynthesis under stress (**hypothesis I**), Wt and  
182 *pdh1-1* were subjected to 48-hour high light treatment (Gonzali et al., 2009), which is known to  
183 induce production of AAA-derived antioxidants (Collakova and DellaPenna, 2003). The levels of  
184 Tyr were not altered, except at 24 hours when Tyr increased slightly in *pdh1-1* compared with Wt  
185 (**Supplementary Fig. 3a**). As expected, high light treatment enhanced tocopherol accumulation,  
186 but to a significantly lesser extent in *pdh1-1* compared with Wt at both 24 and 48 hours  
187 (**Supplementary Fig. 3b**). The levels of anthocyanins, which are also induced under various  
188 stresses including high light stress (Collakova and DellaPenna, 2003), were increased after 24  
189 and 48 hours of high light treatment but was not significantly different between Wt and *pdh1-1*  
190 (**Supplementary Fig. 3c**). These results show that the lack of PDH negatively impacts the  
191 accumulation of HPP-derived tocopherols when their production is induced under high light  
192 conditions.

193

194 ***MtPDH1 is co-expressed with senescence-related genes but pdh1 deficiency has no major***  
195 ***impacts on dark-induced senescence.***

196 To identify potential processes and pathways that are coordinately regulated with *PDH*, a gene  
197 co-expression analysis with *MtPDH1* was performed using the Medicago gene expression atlas  
198 (He et al., 2009). *MtPDH1* was co-expressed with genes mainly involved in senescence-related

199 processes (e.g., nucleases, proteases, and lipases **Supplementary Fig. 1**) and the gene encoding  
200 HPP dioxygenase (HPPD, (Siehl et al., 2014), a senescence-activated enzyme involved in Tyr  
201 catabolism (**Supplementary Fig. 5a**)(Wang et al., 2019). To experimentally test the potential  
202 involvement of PDH in senescence, *PDH* gene expression and enzymatic activity were  
203 monitored at different developmental stages during natural leaf senescence (**Supplementary Fig.**  
204 **4a**). Expression of a senescence marker gene (*MtVPE*, Pérez Guerra et al., 2010) was monitored,  
205 together with loss of chlorophyll in leaves collected at various developmental times from a single  
206 plant, to define stages of leaf senescence (**Supplementary Fig. 4b**). *MtVPE* was basally  
207 expressed in fully green leaves (defined here as the S1 stage), and gradually induced upon  
208 senescence (defined here as S2, S3, and S4; **Supplementary Fig. 4b**), mirroring the loss of  
209 chlorophyll. Fully senescent leaves (S5) were collected but did not yield high-quality RNA and  
210 proteins and were unable to be further analyzed. The highest *MtPDHI* expression was detected in  
211 green (S1) leaves, and PDH enzymatic activity was not induced upon senescence  
212 (**Supplementary Fig. 4c,d**). Thus, *MtPDHI* is not upregulated during natural senescence in the  
213 leaves. Similar to *PDH*, expression of the two *ADH* genes in *M. truncatula* did not follow the  
214 developmental pattern of leaf senescence (**Supplementary Fig. 4c**). Unlike PDH activity,  
215 however, ADH enzymatic activity was gradually induced upon senescence (**Supplementary Fig.**  
216 **4d**).

217         Since *MtPDHI* was co-expressed with *MtHPPD* (**Supplementary Fig. 1**), and PDH  
218 together with HPPD provides a direct route for catabolism of Tyr to homogentisate, eventually  
219 leading to fumarate (**Fig. 1, Supplementary Fig. 5a**), we investigated potential impacts of *pdhl*  
220 deficiency in Tyr catabolism (**hypothesis III**). The expression of genes encoding all enzymes of  
221 the Tyr catabolic pathway were measured in the mutants and Wt under standard growth  
222 conditions (**Supplementary Fig. 5a**, Dixon and Edwards, 2006). The expression of genes

223 encoding the first two steps of the pathway, *HPPD* and homogentisate dioxygenase (*HGO*), were  
224 not significantly altered in the mutants compared with Wt. The subsequent step,  
225 maleylacetoacetate isomerase (*MAAI*), was induced by 2- and 2.5-fold in *pdh1-1* and *pdh1-2*,  
226 respectively (**Supplementary Fig. 5b**), though the final step in the pathway, fumarylacetoacetate  
227 hydrolase (*FAH*), showed opposite expression patterns in the two mutants (**Supplementary Fig.**  
228 **5b**). Thus, no consistent changes in the expression of the Tyr degradation pathway genes, beyond  
229 *MAAI* were observed in *pdh1* mutants.

230 To further examine Tyr catabolism during leaf senescence under artificial, but  
231 controlled, conditions excised leaves from Wt and mutants were exposed to an extended dark  
232 treatment (Xing and Last, 2017; Wang et al., 2019). Over 7 days, leaves from Wt and mutants  
233 responded to dark-induced senescence similarly with no apparent growth phenotypes  
234 (**Supplementary Fig. 6a**). Furthermore, there were no significant differences in  $\alpha$ -tocopherol  
235 levels between Wt and mutants at any time point analyzed (**Supplementary Fig. 6b**). These data  
236 together suggest that the lack of PDH had no substantial effects on Tyr catabolism or metabolism  
237 under standard growth conditions and at least under the senescence conditions tested here  
238 (**Supplementary Figs. 5 & 6**).

239

#### 240 *Less Tyr is accumulated in pdh mutants following shikimate feeding.*

241 Although the steady-state levels of Tyr were not altered in the mutants (**Fig. 3a**), some of the  
242 above data suggest that the PDH enzyme may contribute to Tyr production (**hypothesis I**) at least  
243 under some stress conditions (**Supplementary Figs. 1 and 3b**). Thus, we hypothesized that the  
244 potential role of PDH in Tyr biosynthesis might be manifested when the carbon flux through the  
245 Tyr pathway is elevated. To test this possibility, an intermediate of the shikimate pathway,  
246 shikimate, was exogenously fed to Wt and mutants and the levels of AAAs were analysed.

247 Excised leaves were floated in a solution containing shikimate or H<sub>2</sub>O for up to 8 hours, rinsed to  
248 remove metabolites in the feeding solution, and leaf metabolites were extracted and analyzed  
249 using HPLC and GC-MS. As more prolonged feeding with shikimate led to abnormal leaf  
250 phenotypes, 8 hours was selected as an optimal time for increased carbon flux without pleiotropic  
251 effects. After 8 hours of feeding, shikimate and Phe levels were increased drastically in all  
252 genotypes, suggesting that shikimate was taken up and metabolized by the leaves (**Fig. 4**).  
253 Tocopherol levels were generally unaffected upon shikimate feeding, likely because the feeding  
254 time was not long enough to convert shikimate into tocopherols (**Fig. 4**). Trp levels were reduced  
255 in the mutants compared with Wt after feeding with water, and were induced upon shikimate  
256 feeding in one mutant (**Fig. 4**). The unexpected differences observed with Trp levels under  
257 standard growth conditions (**Fig. 3**) and the feeding experiments (**Fig. 4**) may reflect unknown  
258 stress responses during the feeding experiments. Nevertheless, after 8 hours of feeding, Tyr levels  
259 increased by >39-fold in Wt, but only by 16- and 13-fold in *pdh1-1* and *pdh1-2*, respectively  
260 (**Fig. 4**). Repeated 8 hour shikimate feeding experiments with *pdh1* mutants and Wt yielded  
261 similar Tyr accumulation patterns. The difference in the Tyr accumulation suggests that PDH  
262 contributes to Tyr biosynthesis when carbon flow through the shikimate pathway is enhanced.

263 To determine if global metabolite changes occurred after shikimate feeding, additional  
264 amino acids and TCA pathway metabolites were analyzed by GC-MS. Interestingly, glutamine  
265 levels were higher in H<sub>2</sub>O-fed Wt, compared with mutants (**Supplementary Fig. 7**), and upon  
266 shikimate feeding, glutamine levels were significantly higher in Wt (**Supplementary Fig. 7**). The  
267 levels of TCA cycle intermediates may indicate the functionality of the Tyr catabolic pathway;  
268 however, those TCA cycle intermediates analyzed here, including fumarate, were not  
269 consistently altered after shikimate feeding in Wt and mutants (**Supplementary Fig. 8**). Citrate  
270 levels were reduced in *pdh1-1* and *pdh1-2* compared with Wt in H<sub>2</sub>O control treatment; however

271 after shikimate feeding these differences were no longer apparent (**Supplementary Fig. 8**). These  
272 data did not provide evidence to support the involvement of the PDH enzyme in Tyr catabolism  
273 to the TCA cycle intermediate.

274

### 275 ***PDH has limited role in the legume-rhizobia symbiosis***

276 To test if PDH plays a role in legume-rhizobia symbiosis (**hypothesis IV**), Wt plants and *pdh1-1*  
277 mutants were grown side-by-side on low nitrogen Fahræus medium and inoculated with a  
278 well-characterized rhizobium of *M. truncatula*, *Sinorhizobium meliloti* Rm1021. Nodules were  
279 counted 14, 21, and 28 days post-inoculation (dpi) and acetylene reduction assays (ARA) were  
280 performed to measure nitrogenase activity (Wych and Rains, 1978). At all timepoints *pdh1-1*  
281 mutants did not display any phenotypic difference from Wt plants, including the number of  
282 nodules produced per root (**Fig. 5a**), suggesting that PDH is not essential for nodule  
283 development. *M. truncatula* forms indeterminate nodules that displayed the four standard zones:  
284 I, meristematic; II, infection; III, fixation; and IV, senescence zones in both Wt and *pdh1-1* (**Fig.**  
285 **5b**, Van de Velde et al., 2006). Expression of the bacterial *nifH* gene, which is required for  
286 nitrogen fixation, was monitored through the use of a *S. meliloti* strain expressing a *PnifH::uidA*  
287 fusion to evaluate nodule maturation on *pdh1-1* and Wt plants (Starker et al., 2006). After 21 and  
288 28 dpi,  $\beta$ -glucuronidase (GUS) activity and the overall nodule development were not altered  
289 between *pdh1-1* and Wt (**Fig. 5c**). Although nitrogenase activity in *pdh1-1* appeared to be slightly  
290 reduced compared with Wt at 21 and 28 dpi when nodule senescence might have been initiated,  
291 no significant differences was observed (**Fig. 5d**). ARA were repeated at the 21 dpi timepoint  
292 with *pdh1-1* and this time including *pdh1-2*. Nitrogenase activity was not significantly different  
293 between genotypes, even though *pdh1-1* showed a slight reduction, similar to the first experiment  
294 (**Fig. 5e**).

295           Independently, we also measured the presence and absence of PDH from plant tissue  
296 extracts of over twenty legume species, which were sampled across the legume phylogeny (Azani  
297 et al., 2017, **Supplementary Fig. 9**) and compared with their capacity to form nodules (Afkhami  
298 et al., 2018). All legumes sister to previously analyzed *G. max* (soybean) and *M. truncatula*  
299 (Schenck et al., 2015) showed PDH activity including *Arachis ipaensis* (peanut), which possess a  
300 TyrA enzyme with similar ADH and PDH activity (Schenck et al, 2017). All of these legumes  
301 were previously reported to be able to nodulate (Afkhami et al., 2018). When four legume  
302 species in the genistoid crown were analyzed (e.g. *Lupinus polyphyllus*), PDH activity was not  
303 detectable in any of them, despite successful detection ADH activity (**Supplementary Fig. 9**).  
304 Importantly, these legumes were reported to be able to nodulate, suggesting that legume plants  
305 having undetectable levels of PDH activity can still maintain nodulation. Some early diverging  
306 legume lineages are known to nodulate. Out of four of these species sampled from the mimosid  
307 crown three showed PDH activity (**Supplementary Fig. 9**). In contrast, all four species from  
308 caesalpinoid, another early diverging legume clade, are incapable of nodulating (Afkhami et al.,  
309 2018), but showed PDH activity (**Supplementary Fig. 9**). The lack of detectable PDH activity  
310 (e.g. in the genistoid crown) may be simply due to insufficient sensitivity with HPLC-based assay  
311 and/or the use of tissues that do not necessarily express *PDH*. However, detection of PDH  
312 activity in species lacking nodulation (e.g. in the caesalpinoid node) strongly support the lack of  
313 positive correlation between the presence of PDH activity and nodulation across the legume  
314 phylogeny. Phylogenetic sampling (**Supplementary Fig. 9**) together with *pdh1* mutant analysis  
315 (**Fig. 5**) together suggest that PDH is not essential for legume-rhizobia symbiosis, though more  
316 detailed analyses are needed to fully address its contribution to potentially enhance nitrogen  
317 fixation within the nodules in some legumes.

318

319

320

321

322

323 **DISCUSSION:**

324 In this study, we sought to understand the function of legume-specific PDH enzymes through  
325 analysis of *Tnt1*-transposon mutants of *PDH* in *M. truncatula*. Not only is *M. truncatula* a  
326 convenient model system having mutant populations and many genomic/transcriptomic  
327 resources, but *M. truncatula* also has a single *PDH* gene unlike some other legumes, i.e.,  
328 soybean, having two *PDH* genes (Schenck et al., 2015). Analysis of two independent *pdh1*  
329 mutant lines suggests that MtPDH1 is responsible for all the PDH activity in *M. truncatula* (**Fig.**  
330 **1**). This observation is consistent with chromatographic separation of PDH from ADH in  
331 soybean, which resulted in the detection of a single PDH peak as compared to multiple ADH  
332 peaks (Schenck et al., 2015). Our genetic data also support that ncADH, and ADH enzymes do  
333 not contribute to PDH activity, in agreement with *in vitro* data of soybean and *M. truncatula*  
334 enzymes (Schenck et al., 2015; Schenck et al., 2017a).

335 Surprisingly, the null *pdh1* mutants, displayed no visible aberrant growth phenotypes  
336 (**Fig. 1**). A slight bushy phenotype was observed in the *pdh1-2* allele, but not in *pdh1-1*, and thus  
337 here we focused on consistent responses observed in both alleles to avoid potential pleiotropic  
338 effects specific to *pdh1-2*. The lack of substantial phenotypes in *pdh1* is in contrast to the highly  
339 compromised growth and leaf development phenotypes of Arabidopsis *adh2/tyra2* mutant (de  
340 Oliveira et al., 2019). In *M. truncatula*, we were also unable to recover homozygous mutants of  
341 the canonical *ADH*, which is a single copy gene in *M. truncatula* as compared to two *ADH* copies  
342 present in Arabidopsis (Rippert and Matringe, 2002), further suggesting the essential nature of  
343 the ADH-mediated Tyr pathway in legumes. Thus, the canonical plastid-localized ADH pathway  
344 is the predominant Tyr biosynthetic route and cannot be compensated by the cytosolic PDH  
345 pathway in legumes.

346 Using the *pdh1* mutants, this study further systematically evaluated potential roles of



347 PDH in Tyr biosynthesis (**hypothesis I**), biosynthesis of Tyr- and HPP-derived metabolites (**II**),  
348 Tyr catabolism and senescence (**III**), and legume-rhizobia symbiosis (**IV**). The obtained data  
349 provide evidence for support of **hypothesis I** that the PDH enzyme is involved in Tyr  
350 biosynthesis when carbon flux is increased through the shikimate pathway. Although Tyr levels  
351 were not altered between Wt and mutants under standard conditions (**Fig. 3a**), upon feeding with  
352 shikimate, Wt accumulated over 2-fold more Tyr than *pdh1-1* and *pdh1-2* (**Fig. 4**). Although  
353 AAA biosynthesis is localized to the plastids (Bickel et al., 1978; Jung et al., 1986; Maeda and  
354 Dudareva, 2012), some isoforms of the shikimate and AAA pathway enzymes were detected in  
355 the cytosol (Rubin and Jensen, 1985; Ganson et al., 1986; Ding et al., 2007). Cytosolic CM  
356 activities have been detected from various plant species including soybean (Goers and Jensen,  
357 1984; Kuroki and Conn, 1989; Mobley et al., 1999; Schenck et al., 2015), which are not  
358 regulated by the AAAs, unlike their plastidic counterparts (Eberhard et al., 1996; Mobley et al.,  
359 1999; Westfall et al., 2014). Tyr-insensitive PDH enzymes provide a cytosolic route for  
360 conversion of prephenate into HPP, which can be further transaminated to Tyr by cytosolic  
361 Tyr-AT enzymes (**Fig. 1**) (Wang et al., 2016). Although the PDH-mediated Tyr pathway is not the  
362 predominant route for Tyr biosynthesis, it may provide an alternative route for additional Tyr  
363 synthesis under some conditions that increase flux through the shikimate pathway.

364 The current data also partly support **hypothesis II** that the PDH enzyme contributes to  
365 the production of specialized metabolites derived from Tyr and/or HPP in legumes. Although  
366 Tyr/HPP-derived tocopherols were not altered in the *pdh1* mutants under standard growth  
367 conditions (Fig. 3b), high light-induced tocopherol accumulation was partially attenuated in the  
368 *pdh1* mutant (**Supplementary Figure 3**). Therefore, the PDH enzyme may also contribute to  
369 tocopherol biosynthesis under stress conditions. Some specialized metabolic pathways emerged  
370 through duplication and neofunctionalization of genes from primary metabolic pathways (Weng

371 et al., 2012; Moghe and Last, 2015). The legume PDH enzyme emerged as the result of a recent  
372 gene duplication of an *ADH* gene followed by a shift in substrate specificity from aroenate to  
373 prephenate (Schenck et al., 2017a). Thus, legumes may be able to divert the shikimate pathway  
374 flux to provide additional HPP or Tyr in the cytosol for the synthesis of downstream specialized  
375 metabolites including tocopherols. To further test this possibility, additional metabolomics  
376 experiments were conducted, but did not identify any putative HPP-derived compounds that were  
377 absent or lower in *pdh1* mutants than Wt (**Supplementary Table 1**). Although there are many Tyr  
378 and HPP-derived specialized metabolites produced in plants (e.g., rosmarinic acid, betalains,  
379 dhurrin, and benzyloquinoline alkaloids), none appear to be specific to the legume lineage or  
380 correlate with the distribution of PDH activity (**Supplementary Fig. 9**) (Schenck and Maeda,  
381 2018). Some species of the legume genus *Inga* can accumulate Tyr to 20% of leaf dry weight,  
382 which deters insect predation (Lokvam et al., 2006). Further analysis identified *Inga* species with  
383 high *PDH* expression that have hyper-accumulation of Tyr-derived specialized metabolites, such  
384 as Tyr-gallates (Coley et al., 2019). Therefore, more comprehensive analyses of Tyr-derived  
385 metabolites under different conditions, tissues types, and other legume species may identify  
386 specialized metabolites derived from the PDH enzyme in legumes.

387 The current data did not provide sufficient support for **hypothesis III** that the PDH  
388 pathway potentially contributes to Tyr catabolism and senescence. As Tyr is the most energetic  
389 amino acid (Hildebrandt et al., 2015), its catabolism is a crucial process in recovering energy.  
390 Mutations in Tyr catabolic genes can have dramatic effects of plant development (Han et al.,  
391 2013). Tyr is catabolized into fumarate, a TCA pathway intermediate, first by conversion into  
392 HPP via a Tyr-AT enzyme and further through the canonical Tyr catabolism pathway  
393 (**Supplementary Fig. 5a**) (Hildebrandt et al., 2015). Knockout of a soybean *HGO* did not cause  
394 lethality but led to an increase in vitamin E content by 2-fold, suggesting that a significant

395 amount of carbon flux is diverted into vitamin E production when Tyr catabolism is blocked  
396 (Stacey et al., 2016). Furthermore, *MtPDH1* was co-expressed with *HPPD*, which together  
397 provide a direct pathway for homogentisate production. This potential coordination of PDH and  
398 *HPPD*, and cytosolic localization, can bypass three enzymatic steps of the ADH-mediated Tyr  
399 biosynthetic pathway, catalyzed by PPA-AT, ADH, and Tyr-AT to enter into the canonical Tyr  
400 catabolism pathway (**Fig. 1 & Supplementary Fig. 5a**). Additionally, *PDH* was co-expressed  
401 with many senescence-related genes (**Supplementary Fig. 1**, Van de Velde et al., 2006; Kusaba  
402 et al., 2013; Xi et al., 2013) suggesting that *PDH* may function when Tyr catabolism is enhanced.  
403 Despite these correlative data, however, experiments designed here to test the potential link  
404 between PDH and senescence did not provide evidence to support this hypothesis: upon  
405 dark-induced (**Supplementary Fig. 6**) and natural senescence (**Supplementary Fig. 4**)  
406 conditions that likely stimulate Tyr catabolism, no phenotypic differences were observed between  
407 mutants and Wt. Also, genes involved in Tyr catabolism were not consistently altered in mutants  
408 as compared to Wt (**Supplementary Fig. 5b**), and PDH expression and enzymatic activity were  
409 not induced upon senescence (**Supplementary Fig. 4c**). Thus, further experiments under  
410 different conditions (e.g. specific stress that induces Tyr catabolism) are needed to address the  
411 potential role of PDH in Tyr catabolism and senescence.

412         The data obtained in this study failed to directly support the **hypothesis IV** that the PDH  
413 pathway plays a role in legume-rhizobia symbiosis. Legumes initiate a symbiotic relationship  
414 with soil-dwelling rhizobia when there is insufficient nitrogen (Oldroyd et al., 2011). A chemical  
415 communication ensues that ultimately results in compatible rhizobia invading legume roots and  
416 formation of a new organ, the root nodule (Oldroyd, 2013). In the nodule, rhizobia fix  
417 atmospheric dinitrogen into ammonium, which is assimilated by the plant through the glutamine  
418 synthetase-glutamine oxoglutarate aminotransferase (GS-GOGAT) cycle, in which glutamine and

419 glutamate are key amino acid carriers (Krapp, 2015). Mutations in *MtPDH1* did not alter nodule  
420 numbers (**Fig. 5a**) or the developmental progression of the nodules (**Fig. 5c**). Furthermore,  
421 nitrogenase activity was not significantly affected in mutants at any stage during the symbiotic  
422 interaction even when senescence might have been initiated (**Figs. 5d,e**). Alterations in nitrogen  
423 assimilation can lead to reduced nodulation in legumes (Streeter and Wong, 1988; Matamoros et  
424 al., 1999): for example, plants treated with a GS inhibitor phosphinothricin (PPT) result in loss of  
425 nodulation (Seabra et al., 2012) and also stimulate *MtPDH1* expression (**Supplementary Fig. 1**)  
426 as well as many other genes. Interestingly, *pdh1-1* and *pdh1-2* had reduced glutamine levels in  
427 the H<sub>2</sub>O-treated control leaves after 8 hours (**Supplementary Fig. 7**), which also persisted after  
428 shikimate feeding (**Supplementary Fig. 7**). Reduced glutamine levels in the *pdh1* mutants may,  
429 in turn, affect the symbiotic efficiency with rhizobia, although no statistically-significant  
430 reduction in nitrogenase activity was observed (**Figs. 5d,e**). Furthermore, PDH activity, which  
431 was measured in a phylogenetically diverse group of legumes, does not correlate with ability to  
432 nodulate (Azani et al., 2017; Afkhami et al., 2018, **Supplementary Fig. 9**). Thus, although PDH  
433 may provide an adaptive advantage to some legumes, it is likely not directly involved in and  
434 essential for the legume-rhizobia symbiosis.

435

436

437

438

439

440

441 **FIGURES:**

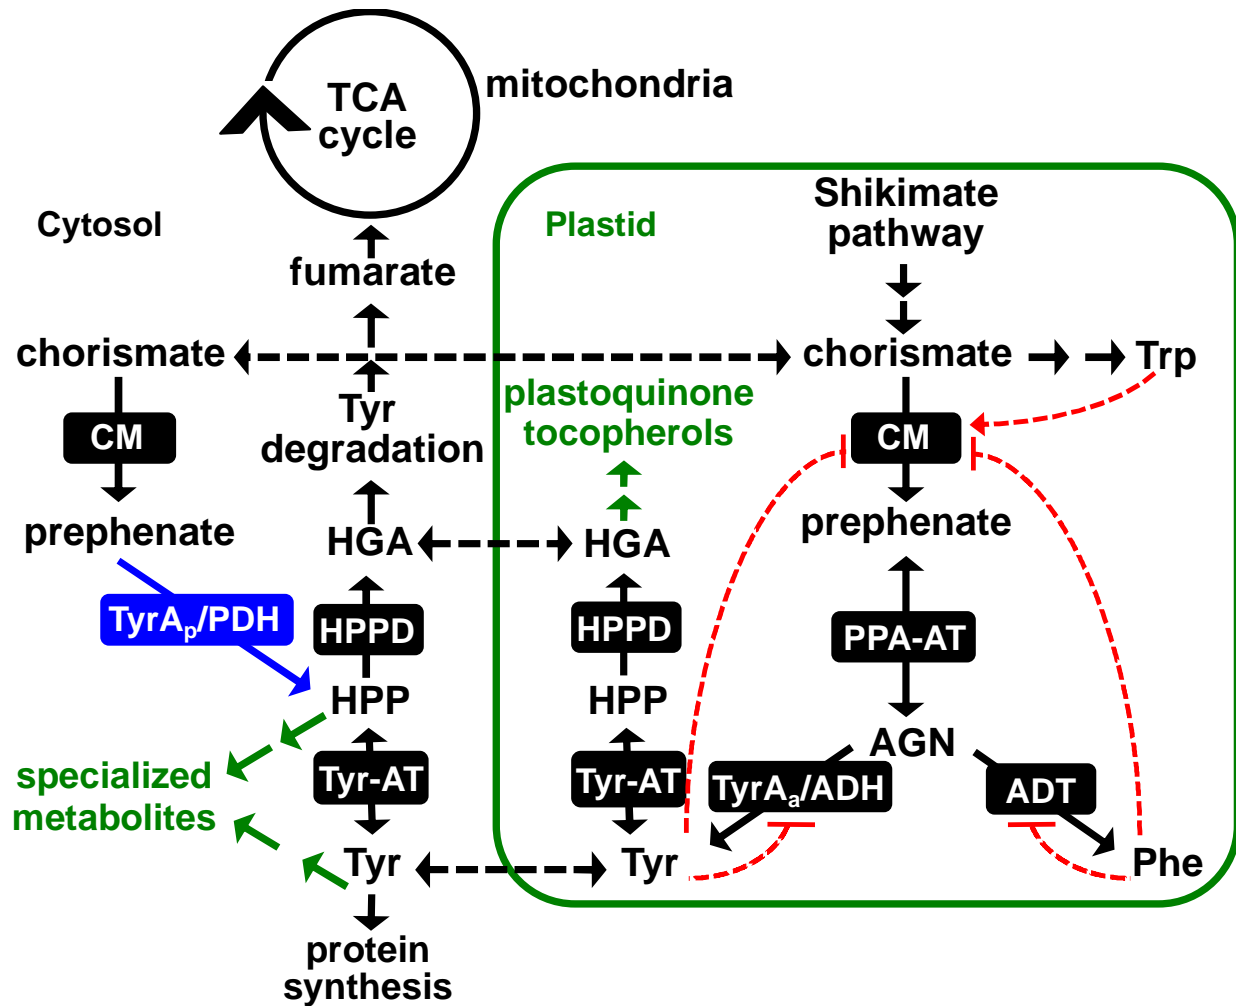

442

443 **Figure 1. Tyr biosynthesis in legumes.** In addition to a highly regulated plastid localized ADH pathway  
 444 for Tyr biosynthesis, legumes possess a Tyr-insensitive, cytosolic PDH enzyme (blue). Tyr synthesized in  
 445 the plastids is exported into the cytosol where it can be incorporated into proteins, enter the Tyr degradation  
 446 pathway to the TCA cycle or serve as a precursor to specialized metabolism. Black dotted lines denote  
 447 known or potential transport steps, red dotted lines represent feedback regulation with arrows meaning  
 448 induction and hashes inhibition. AGN, arogenate; ADT, arogenate dehydratase; CM, chorismate mutase;  
 449 HGA, homogentisate; HPP, 4-hydroxyphenylpyruvate; HPPD, HPP dioxygenase; PPA-AT, prephenate  
 450 aminotransferase; Tyr<sub>a</sub>/ADH, arogenate dehydrogenase; Tyr<sub>p</sub>/PDH, prephenate dehydrogenase;  
 451 Tyr-AT, tyrosine aminotransferase.

452

453

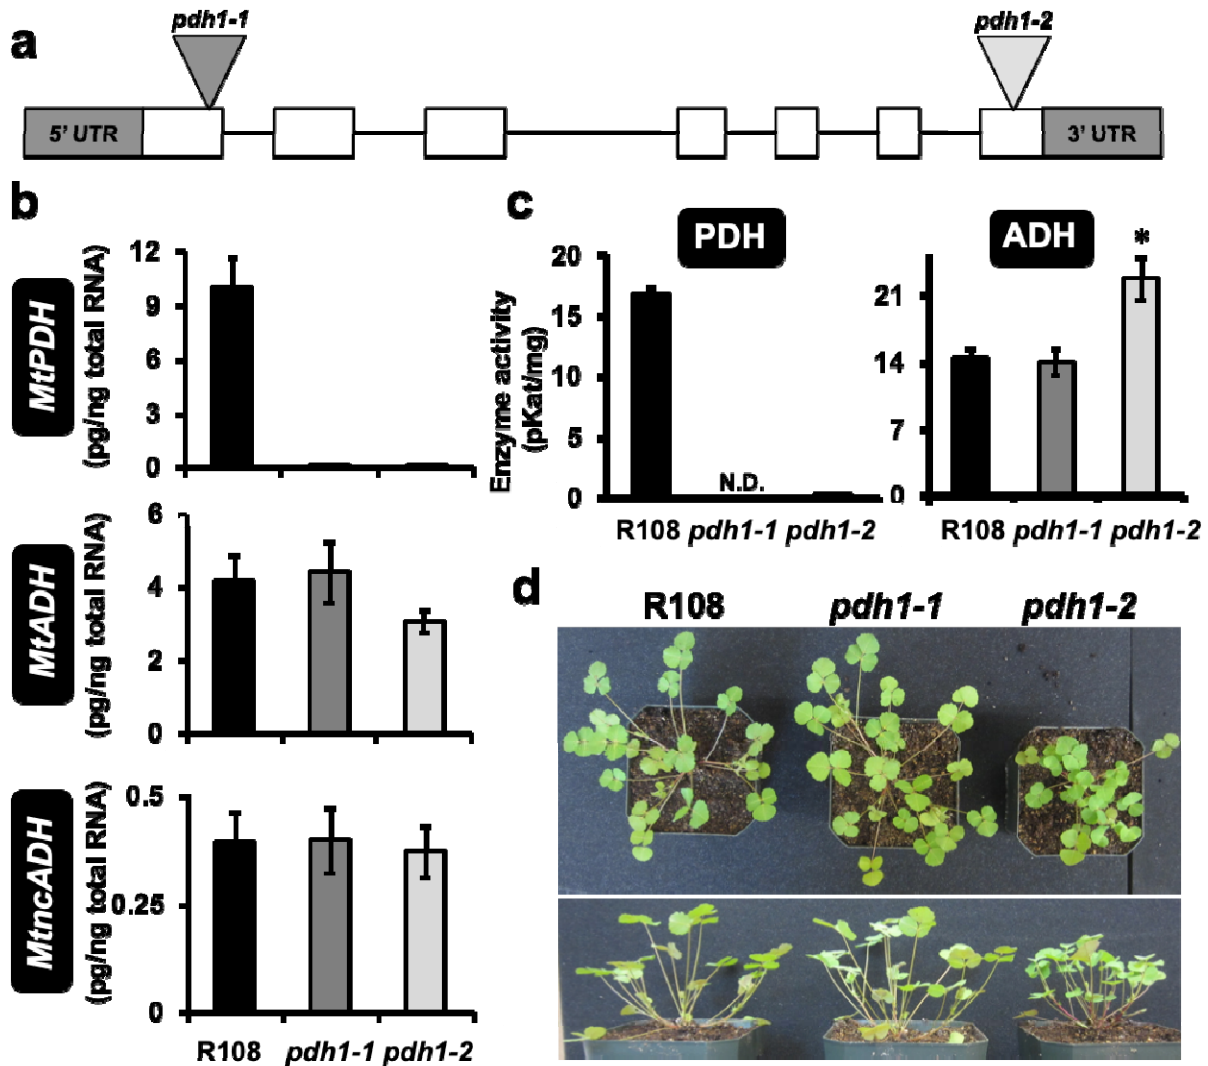

454  
 455 **Figure 2. Isolation of *MtPDHI* mutants.** (a) *MtPDHI* (Mt3g071980) genomic structure, exons (white  
 456 boxes) and introns (lines), 5' and 3' untranslated regions (UTR, gray boxes). Two *Tnt1*-transposon mutants  
 457 were isolated with insertions in exon one (*pdh1-1*) and seven (*pdh1-2*). (b) *MtPDHI* transcripts were nearly  
 458 abolished in *pdh1-1* and *pdh1-2*, without effecting expression of either *ADH* homolog. Bars represent  
 459 average absolute mRNA levels (pg/ng total RNA) ± s.e.m of n = 3 biological replicates. (c) PDH and ADH  
 460 activity from mutants and wild-type (Wt, R108). Bars represent average enzymatic activity (pKat mg<sup>-1</sup>) ±  
 461 s.e.m of n = 3 biological replicates. Significant differences to R108 control are indicated; \**P* ≤ 0.05. (d)  
 462 Phenotype of R108 and mutants after 6-weeks growth under standard conditions.

463

464

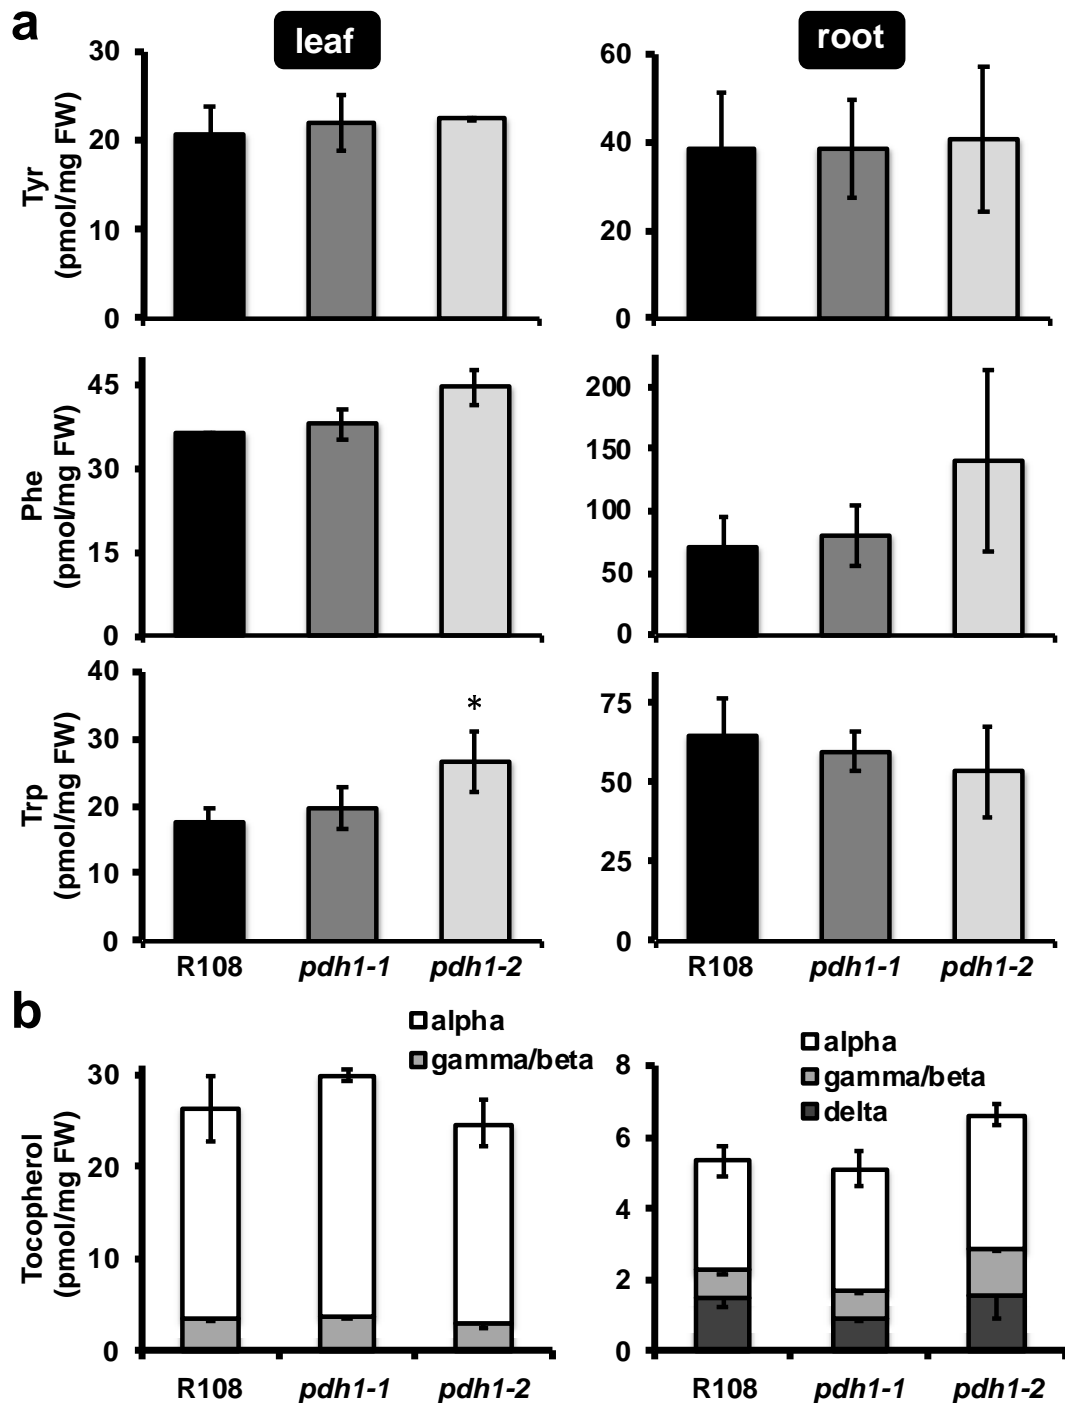

465

466 **Figure 3. Targeted metabolite analysis of *mtpdh1* mutants and Wt.** Leaf and root tissue from  
 467 6-week-old plants, grown under standard conditions were used for metabolite extraction. Bars represent  
 468 average absolute metabolite levels (pmol/mg fresh weight (FW))  $\pm$  s.e.m of  $n = 3$  biological replicates. (a)  
 469 Aromatic amino acid levels in leaf and root tissue. Significant differences to Wt (R108) control are  
 470 indicated; \* $P \leq 0.05$ . (b) Tocopherol composition and content from leaf and root tissue.

471

472

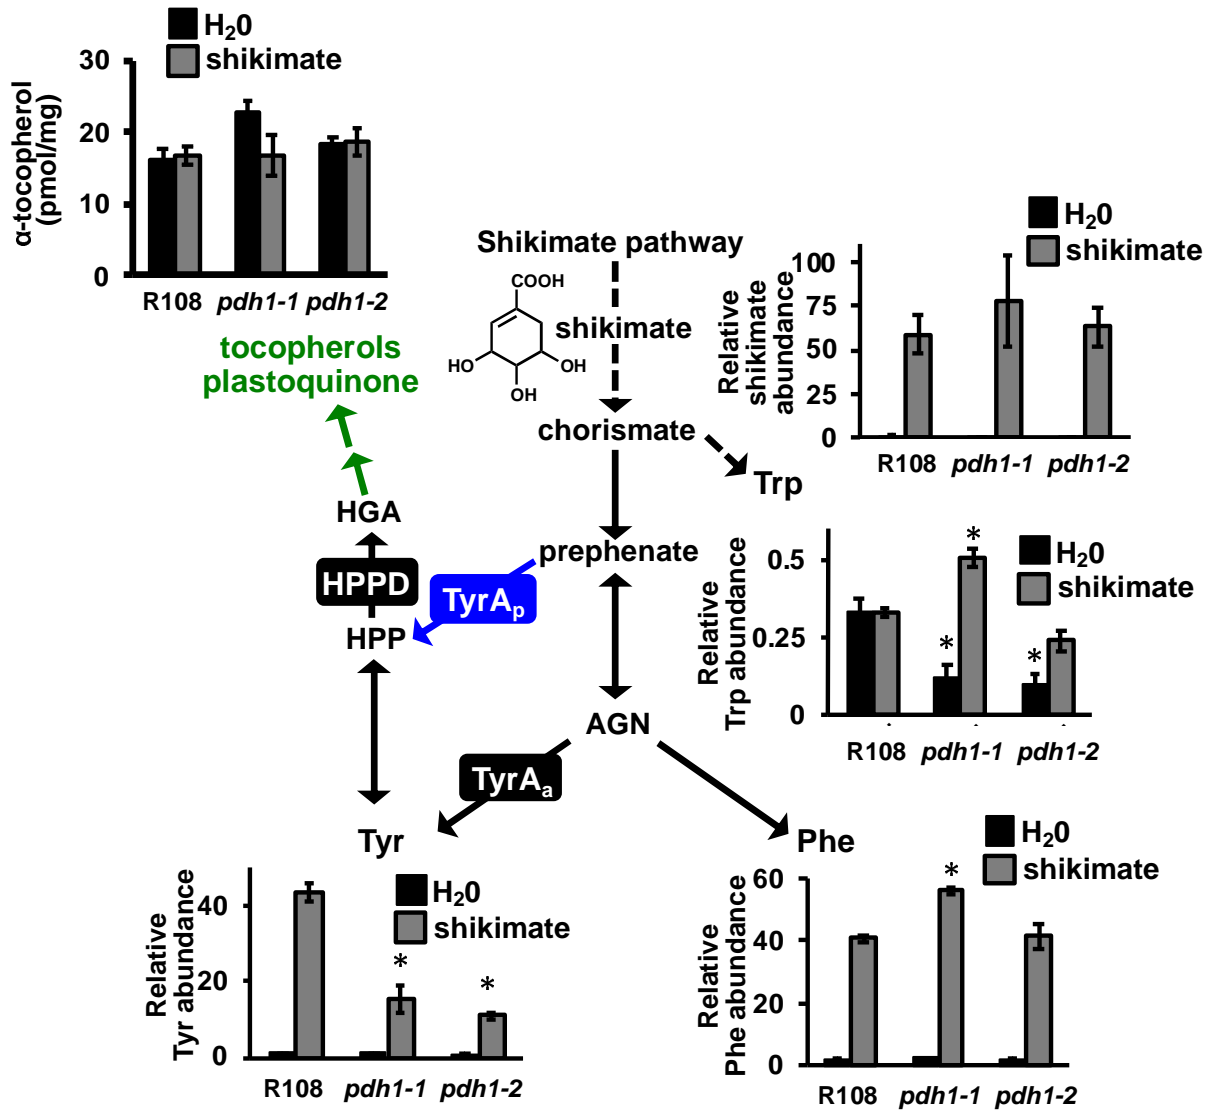

473

474 **Figure 4. Metabolite analysis after shikimate feeding in Wt and *mtpdh1* mutants.** Excised leaves from  
 475 6-week-old plants were floated on a solution containing H<sub>2</sub>O (black bars) or 25 mM shikimate (gray bars) for  
 476 8 hours under constant light. Leaves were then used for metabolite analysis using GC-MS (Tyr, Trp, Phe  
 477 and shikimate) or HPLC ( $\alpha$ -tocopherol). Bars represent average relative metabolite abundance of Tyr, Phe,  
 478 Trp and shikimate  $\pm$  s.e.m of n = 3 biological replicates.  $\alpha$ -tocopherol is shown as the average absolute  
 479 metabolite abundance in pmol/mg FW  $\pm$  s.e.m of n = 3 biological replicates. Additional metabolites after  
 480 shikimate feeding are shown in **Supplementary Figures 8 & 9**. Significant differences to Wt (R108)  
 481 control are indicated; \* $P \leq 0.05$ .



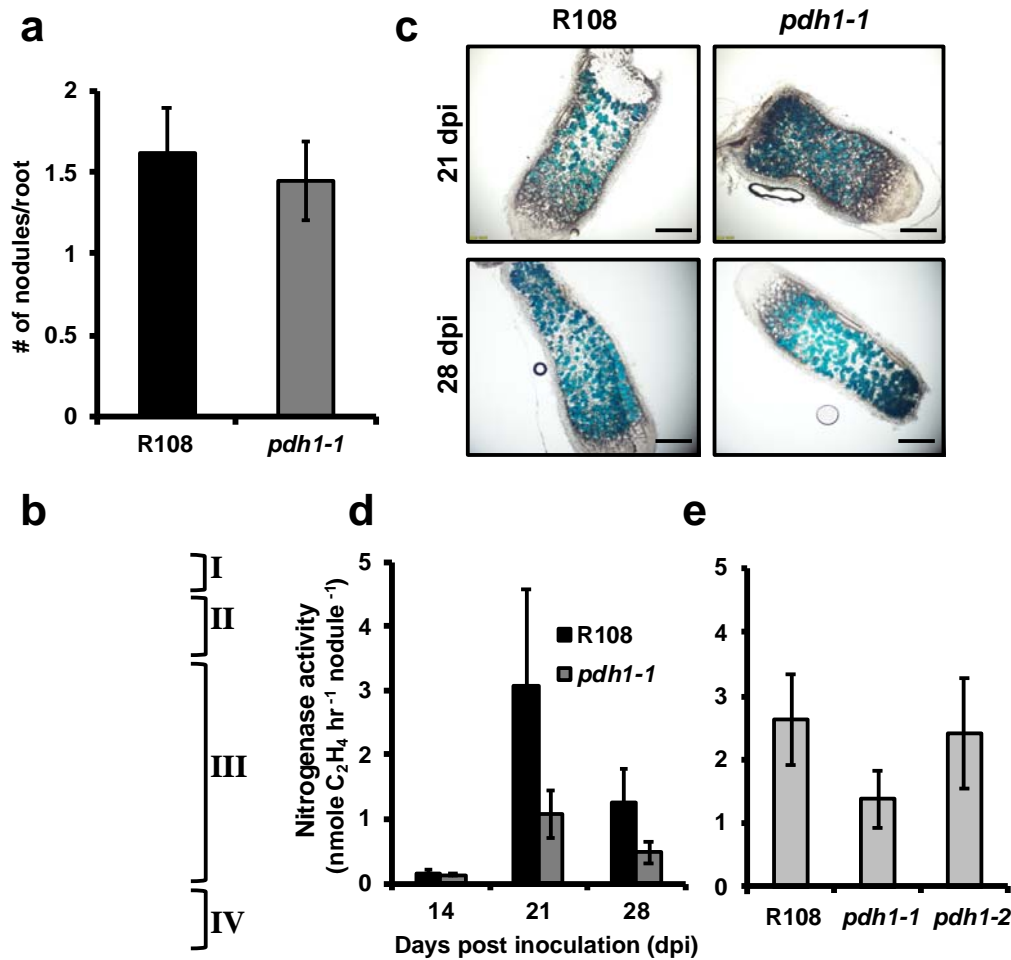

482  
 483 **Figure 5. The role of PDH in legume-rhizobia symbiosis.** (a) Wt and *pdh1-1* were grown on plates with  
 484 low nitrogen Fahräeus medium, and 14 days post inoculation (dpi) with *S. meliloti* nodules were counted.  
 485 Bars represent average number of nodules per root  $\pm$  s.e.m. with  $n > 11$  plants. (b) Indeterminate nodules  
 486 from *M. truncatula* consist of four developmental zones. I meristem, II infection, III fixation, and IV  
 487 senescence located closest to the root. These four developmental zones are shown on a characteristic nodule  
 488 (enlarged for visualization) from 28 dpi. GUS staining with *PnifH::UidA* shows expression of bacterial *nifH*  
 489 gene localized to the bacteroids (blue). (c) Thin sections of nodules from 21 and 28 dpi showing expression  
 490 of *PnifH::UidA*, highlight bacteroid and nodule development in R108 and *pdh1-1*. Approximately equal  
 491 staining was observed in all nodule developmental zones, suggesting *pdh1-1* is not affected in nodule  
 492 development or bacteroid number, scale bar = 1 mM. (d) Nitrogen fixation efficiency was measured using  
 493 an acetylene reduction assay (ARA). Plants were grown under the same conditions as in a, 14, 21 and 28 dpi  
 494 ethylene production was measured and expressed as the average  $\pm$  s.e.m with  $n > 7$ . (e) Nitrogen fixation  
 495 efficiency assay performed in the same way as in (d) however, only at 21 dpi and with both mutant alleles  
 496 and Wt. Activity is expressed as the average  $\pm$  s.e.m with  $n > 4$ .

497

498 **Acknowledgements:**

499 This work was supported by grants from the National Science Foundation IOS-1354971 to  
500 H.A.M. and NSF#1331098 and NSF#1546742 to JMA. LWS is supported in part by NSF awards  
501 1340058, 1743594, 1139489, and 1639618. The University of Missouri, Office of Research  
502 provided initial instrumental and personnel funding for the MU Metabolomics Center.  
503 Development of *M. truncatula Tnt1* mutant population was, in part, funded by the National  
504 Science Foundation, USA (DBI-0703285 and IOS-1127155) to KSM. We thank the Germplasm  
505 Resources Information Network (GRIN) for providing some of the legume seeds used in this  
506 study.

507

508 **Conflict of Interest Statement:**

509 The authors declare no conflicts of interest.

510

511 **Author Contribution:**

512 CAS, JW, DJ, and KG carried our experiments and interpreted results. CAS, JMA, LWS, and  
513 HAM designed experiments. KSM and JW developed *Tnt1* mutant lines. CAS and HAM wrote the  
514 manuscript. All authors read and edited the manuscript.

515

516 **REFERENCES:**

- 517 **Afkhami ME, Luke Mahler D, Burns JH, Weber MG, Wojciechowski MF, Sprent J, Strauss SY**  
518 (2018) Symbioses with nitrogen-fixing bacteria: nodulation and phylogenetic data across legume  
519 genera. *Ecology* **99**: 502
- 520 **Azani N, Babineau M, Bailey CD, Banks H, Barbosa AR, Pinto RB, Boatwright JS, Borges LM,**  
521 **Brown GK, Bruneau A, et al** (2017) A new subfamily classification of the Leguminosae based  
522 on a taxonomically comprehensive phylogeny: The Legume Phylogeny Working Group (LPWG).  
523 *TAXON* **66**: 44–77
- 524 **Barken I, Geller J, Rogosnitzky M** (2008) Noscapine inhibits human prostate cancer progression and  
525 metastasis in a mouse model. *Anticancer Res* **28**: 3701–3704
- 526 **Barros J, Serrani-Yarce JC, Chen F, Baxter D, Venables BJ, Dixon RA** (2016) Role of bifunctional  
527 ammonia-lyase in grass cell wall biosynthesis. *Nat Plants* **2**: 16050
- 528 **Beudoin GAW, Facchini PJ** (2014) Benzylisoquinoline alkaloid biosynthesis in opium poppy. *Planta*  
529 **240**: 19–32
- 530 **Beudoin-Eagan LD, Thorpe TA** (1985) Tyrosine and phenylalanine ammonia lyase activities during  
531 shoot initiation in tobacco callus cultures. *Plant Physiol* **78**: 438–441
- 532 **Benedito VA, Torres-Jerez I, Murray JD, Andriankaja A, Allen S, Kakar K, Wandrey M, Verdier J,**  
533 **Zuber H, Ott T, et al** (2008) A gene expression atlas of the model legume *Medicago truncatula*.  
534 *Plant J Cell Mol Biol* **55**: 504–513
- 535 **Betz GA, Gerstner E, Stich S, Winkler B, Welzl G, Kremmer E, Langebartels C, Heller W,**  
536 **Sandermann H, Ernst D** (2009) Ozone affects shikimate pathway genes and secondary  
537 metabolites in saplings of European beech (*Fagus sylvatica* L.) grown under greenhouse  
538 conditions. *Trees* **23**: 539–553
- 539 **Bickel H, Palme L, Schultz G** (1978) Incorporation of shikimate and other precursors into aromatic  
540 amino acids and prenylquinones of isolated spinach chloroplasts. *Phytochemistry* **17**: 119–124
- 541 **Bramley PM, Elmadfa I, Kafatos A, Kelly FJ, Manios Y, Roxborough HE, Schuch W, Sheehy PJA,**  
542 **Wagner K-H** (2000) Vitamin E. *J Sci Food Agric* **80**: 913–938
- 543 **Catoira R, Galera C, de Billy F, Penmetsa RV, Journet EP, Maillet F, Rosenberg C, Cook D, Gough**

- 544 **C, Dénarié J** (2000) Four genes of *Medicago truncatula* controlling components of a nod factor  
545 transduction pathway. *Plant Cell* **12**: 1647–1666
- 546 **Cheng X, Wang M, Lee H-K, Tadege M, Ratet P, Udvardi M, Mysore KS, Wen J** (2014) An efficient  
547 reverse genetics platform in the model legume *Medicago truncatula*. *New Phytol* **201**: 1065–1076
- 548 **Coley PD, Endara M-J, Ghabash G, Kidner CA, Nicholls JA, Pennington RT, Mills AG, Soule AJ,**  
549 **Lemes MR, Stone GN, et al** (2019) Macroevolutionary patterns in overexpression of tyrosine: an  
550 anti-herbivore defence in a speciose tropical tree genus, *Inga* (Fabaceae). *J Ecol* **107**: 1620–1632
- 551 **Collakova E, DellaPenna D** (2003) Homogentisate phytyltransferase activity is limiting for tocopherol  
552 biosynthesis in *Arabidopsis*. *Plant Physiol* **131**: 632–642
- 553 **Connelly JA, Conn EE** (1986) Tyrosine biosynthesis in *Sorghum bicolor*: isolation and regulatory  
554 properties of arogenate dehydrogenase. *Z Naturforschung C J Biosci* **41**: 69–78
- 555 **D’Amato T, Ganson RJ, Gaines C, Jensen R** (1984) Subcellular localization of chorismate-mutase  
556 isoenzymes in protoplasts from mesophyll and suspension-cultured cells of *Nicotiana glauca*.  
557 *Planta* **162**: 104–108
- 558 **Ding L, Hofius D, Hajirezaei M-R, Fernie AR, Börnke F, Sonnewald U** (2007) Functional analysis of  
559 the essential bifunctional tobacco enzyme 3-dehydroquinate dehydratase/shikimate  
560 dehydrogenase in transgenic tobacco plants. *J Exp Bot* **58**: 2053–67
- 561 **Dixon DP, Edwards R** (2006) Enzymes of tyrosine catabolism in *Arabidopsis thaliana*. *Plant Sci* **171**:  
562 360–366
- 563 **Dyer WE, Henstrand JM, Handa AK, Herrmann KM** (1989) Wounding induces the first enzyme of  
564 the shikimate pathway in Solanaceae. *Proc Natl Acad Sci U S A* **86**: 7370–7373
- 565 **Eberhard J, Ehrlert T, Epple P, Felix G, Raesecke H-R, Amrhein N, Schmid J** (1996) Cytosolic and  
566 plastidic chorismate mutase isozymes from *Arabidopsis thaliana*: molecular characterization and  
567 enzymatic properties. *Plant J* **10**: 815–821
- 568 **Fitzpatrick PF** (1999) Tetrahydropterin-dependent amino acid hydroxylases. *Annu Rev Biochem* **68**:  
569 355–381
- 570 **Gaines CG, Byng GS, Whitaker RJ, Jensen RA** (1982) L-Tyrosine regulation and biosynthesis via  
571 arogenate dehydrogenase in suspension-cultured cells of *Nicotiana glauca* Speng. et Comes.

- 572           Planta **156**: 233–240
- 573   **Gamborg OL, Keeley FW** (1966) Aromatic metabolism in plants I. A study of the prephenate  
574           dehydrogenase from bean plants. *Biochim Biophys Acta* **115**: 65–72
- 575   **Ganson RJ, D’Amato TA, Jensen RA** (1986) The two-isozyme system of  
576           3-deoxy-d-arabino-heptulosonate 7-phosphate synthase in *Nicotiana silvestris* and other higher  
577           plants. *Plant Physiol* **82**: 203–10
- 578   **Giebel J** (1973) Phenylalanine and tyrosine ammonia-lyase activities in potato roots and their significance  
579           in potato resistance to *Heterodera rostochiensis*. *Nematologica* **19**: 3–6
- 580   **Gilbert GA, Gadush MV, Wilson C, Madore MA** (1998) Amino acid accumulation in sink and source  
581           tissues of *Coleus blumei* Benth. during salinity stress. *J Exp Bot* **49**: 107–114
- 582   **Goers SK, Jensen RA** (1984) Separation and characterization of two chorismate-mutase isoenzymes  
583           from *Nicotiana silvestris*. *Planta* **162**: 109–116
- 584   **Gonzali S, Mazzucato A, Perata P** (2009) Purple as a tomato: towards high anthocyanin tomatoes.  
585           *Trends Plant Sci* **14**: 237–241
- 586   **Han C, Ren C, Zhi T, Zhou Z, Liu Y, Chen F, Peng W, Xie D** (2013) Disruption of fumarylacetoacetate  
587           hydrolase causes spontaneous cell death under short-day conditions in *Arabidopsis*. *Plant Physiol*  
588           **162**: 1956–1964
- 589   **Hardy RWF, Holsten RD, Jackson EK, Burns RC** (1968) The acetylene-ethylene assay for N<sub>2</sub> fixation:  
590           laboratory and field evaluation. *Plant Physiol* **43**: 1185–1207
- 591   **He J, Benedito VA, Wang M, Murray JD, Zhao PX, Tang Y, Udvardi MK** (2009) The *Medicago*  
592           *truncatula* gene expression atlas web server. *BMC Bioinformatics* **10**: 441
- 593   **Higuchi T, Ito Y, Kawamura I** (1967) *p*-hydroxyphenylpropane component of grass lignin and role of  
594           tyrosine-ammonia lyase in its formation. *Phytochemistry* **6**: 875–881
- 595   **Hildebrandt TM, Nunes Nesi A, Araújo WL, Braun H-P** (2015) Amino acid catabolism in plants. *Mol*  
596           *Plant* **8**: 1563–79
- 597   **Jung E, Zamir LO, Jensen RA** (1986) Chloroplasts of higher plants synthesize L-phenylalanine via  
598           L-arogenate. *Proc Natl Acad Sci U S A* **83**: 7231–7235

- 599 **Khan W, Prithviraj B, Smith DL** (2003) Chitosan and chitin oligomers increase phenylalanine  
600 ammonia-lyase and tyrosine ammonia-lyase activities in soybean leaves. *J Plant Physiol* **160**:  
601 859–863
- 602 **Krapp A** (2015) Plant nitrogen assimilation and its regulation: a complex puzzle with missing pieces.  
603 *Curr Opin Plant Biol* **25**: 115–122
- 604 **Kries H, O'Connor SE** (2016) Biocatalysts from alkaloid producing plants. *Curr Opin Chem Biol* **31**:  
605 22–30
- 606 **Kryvoruchko IS, Sinharoy S, Torres-Jerez I, Sosso D, Pislariu CI, Guan D, Murray J, Benedito VA,**  
607 **Frommer WB, Udvardi MK** (2016) MtSWEET11, a nodule-specific sucrose transporter of  
608 *Medicago truncatula*. *Plant Physiol* **171**: 554–565
- 609 **Kuroki GW, Conn EE** (1989) Differential activities of chorismate mutase isozymes in tubers and leaves  
610 of *Solanum tuberosum* L. *Plant Physiol* **89**: 472–6
- 611 **Kusaba M, Tanaka A, Tanaka R** (2013) Stay-green plants: what do they tell us about the molecular  
612 mechanism of leaf senescence. *Photosynth Res* **117**: 221–234
- 613 **Lee J, Durst RW, Wrolstad RE** (2005) Determination of total monomeric anthocyanin pigment content  
614 of fruit juices, beverages, natural colorants, and wines by the pH differential method:  
615 collaborative study. *J AOAC Int* **88**: 1269–1278
- 616 **Lokvam J, Brenes-Arguedas T, Lee JS, Coley PD, Kursar TA** (2006) Allelochemic function for a  
617 primary metabolite: the case of L-tyrosine hyper-production in *Inga umbellifera* (Fabaceae). *Am J*  
618 *Bot* **93**: 1109–1115
- 619 **Maeda H, Dudareva N** (2012) The shikimate pathway and aromatic amino acid biosynthesis in plants.  
620 *Annu Rev Plant Biol* **63**: 73–105
- 621 **Maeda H, Yoo H, Dudareva N** (2011) Prephenate aminotransferase directs plant phenylalanine  
622 biosynthesis via arogenate. *Nat Chem Biol* **7**: 19–22
- 623 **Maeda HA** (2019) Evolutionary diversification of primary metabolism and Its contribution to plant  
624 chemical diversity. *Front Plant Sci*. doi: 10.3389/fpls.2019.00881
- 625 **Matamoros MA, Baird LM, Escuredo PR, Dalton DA, Minchin FR, Iturbe-Ormaetxe I, Rubio MC,**  
626 **Moran JF, Gordon AJ, Becana M** (1999) Stress-induced legume root nodule senescence.

- 627           physiological, biochemical, and structural alterations. *Plant Physiol* **121**: 97–112
- 628   **Metz JG, Nixon PJ, Rogner M, Brudvig GW, Diner BA** (1989) Directed alteration of the D1  
629           polypeptide of photosystem II: evidence that tyrosine-161 is the redox component, Z, connecting  
630           the oxygen-evolving complex to the primary electron donor, P680. *Biochemistry* **28**: 6960–6969
- 631   **Mitra PP, Loqué D** (2014) Histochemical staining of *Arabidopsis thaliana* secondary cell wall elements.  
632           *JoVE J Vis Exp* e51381–e51381
- 633   **Mobley EM, Kunkel BN, Keith B** (1999) Identification, characterization and comparative analysis of a  
634           novel chorismate mutase gene in *Arabidopsis thaliana*. *Gene* **240**: 115–23
- 635   **Moghe GD, Last RL** (2015) Something old, something new: conserved enzymes and the evolution of  
636           novelty in plant specialized metabolism. *Plant Physiol* **169**: 1512–1523
- 637   **Møller BL** (2010) Functional diversifications of cyanogenic glucosides. *Curr Opin Plant Biol* **13**: 338–47
- 638   **Oldroyd GED** (2013) Speak, friend, and enter: signalling systems that promote beneficial symbiotic  
639           associations in plants. *Nat Rev Microbiol* **11**: 252–263
- 640   **Oldroyd GED, Murray JD, Poole PS, Downie JA** (2011) The rules of engagement in the  
641           legume-rhizobial symbiosis. *Annu Rev Genet* **45**: 119–44
- 642   **de Oliveira MVV, Jin X, Chen X, Griffith D, Batchu S, Maeda HA** (2019) Imbalance of tyrosine by  
643           modulating TyrA arogenate dehydrogenases impacts growth and development of *Arabidopsis*  
644           *thaliana*. *Plant J* **97**: 901–922
- 645   **Pérez Guerra JC, Coussens G, De Keyser A, De Rycke R, De Bodt S, Van De Velde W, Goormachtig**  
646           **S, Holsters M** (2010) Comparison of developmental and stress-induced nodule senescence in  
647           *Medicago truncatula*. *Plant Physiol* **152**: 1574–1584
- 648   **Petersen M** (2013) Rosmarinic acid: new aspects. *Phytochem Rev* **12**: 207–227
- 649   **Pomar F, Merino F, Barceló AR** (2002) *O*-4-Linked coniferyl and sinapyl aldehydes in lignifying cell  
650           walls are the main targets of the Wiesner (phloroglucinol-HCl) reaction. *Protoplasma* **220**: 17–28
- 651   **Qian Y, Lynch JH, Guo L, Rhodes D, Morgan JA, Dudareva N** (2019) Completion of the cytosolic  
652           post-chorismate phenylalanine biosynthetic pathway in plants. *Nat Commun* **10**: 15
- 653   **Rippert P, Matringe M** (2002) Purification and kinetic analysis of the two recombinant arogenate



- 654 dehydrogenase isoforms of *Arabidopsis thaliana*. *Eur J Biochem* **269**: 4753–4761
- 655 **Rosler J, Krekel F, Amrhein N, Schmid J** (1997) Maize Phenylalanine Ammonia-Lyase Has Tyrosine  
656 Ammonia-Lyase Activity. *Plant Physiol* **113**: 175–179
- 657 **Rubin JL, Jensen RA** (1985) Differentially regulated isozymes of  
658 3-deoxy-d-arabino-heptulosonate-7-phosphate synthase from seedlings of *Vigna radiata* [L.]  
659 Wilczek. *Plant Physiol* **79**: 711–718
- 660 **Rubin JL, Jensen RA** (1979) Enzymology of L-tyrosine biosynthesis in mung bean (*Vigna radiata* [L.]  
661 Wilczek). *Plant Physiol* **64**: 727–734
- 662 **Ruijter JM, Pfaffl MW, Zhao S, Spiess AN, Boggy G, Blom J, Rutledge RG, Sisti D, Lievens A, De  
663 Preter K, et al** (2013) Evaluation of qPCR curve analysis methods for reliable biomarker  
664 discovery: bias, resolution, precision, and implications. *Methods* **59**: 32–46
- 665 **Schenck CA, Chen S, Siehl DL, Maeda HA** (2015) Non-plastidic, tyrosine-insensitive prephenate  
666 dehydrogenases from legumes. *Nat Chem Biol* **11**: 52–57
- 667 **Schenck CA, Holland CK, Schneider MR, Men Y, Lee SG, Jez JM, Maeda HA** (2017a) Molecular  
668 basis of the evolution of alternative tyrosine biosynthetic routes in plants. *Nat Chem Biol* **13**:  
669 1029–1035
- 670 **Schenck CA, Men Y, Maeda HA** (2017b) Conserved molecular mechanism of TyrA dehydrogenase  
671 substrate specificity underlying alternative tyrosine biosynthetic pathways in plants and microbes.  
672 *Front Mol Biosci*. doi: 10.3389/fmolb.2017.00073
- 673 **Schenck CA, Maeda HA** (2018) Tyrosine biosynthesis, metabolism, and catabolism in plants.  
674 *Phytochemistry* **149**: 82–102
- 675 **Seabra AR, Pereira P a, Becker JD, Carvalho HG** (2012) Inhibition of glutamine synthetase by  
676 phosphinothricin leads to transcriptome reprogramming in root nodules of *Medicago truncatula*.  
677 *Mol Plant Microbe Interact* **25**: 976–92
- 678 **Siehl D** (1999) The biosynthesis of tryptophan, tyrosine, and phenylalanine from chorismate. *In* B Singh,  
679 ed, *Plant Amino Acids Biochem. Biotechnol.* CRC Press, New York, pp 171–204
- 680 **Siehl DL, Tao Y, Albert H, Dong Y, Heckert M, Madrigal A, Lincoln-Cabatu B, Lu J, Fenwick T,  
681 Bermudez E, et al** (2014) Broad 4-hydroxyphenylpyruvate dioxygenase inhibitor herbicide



- 682 tolerance in soybean with an optimized enzyme and expression cassette. *Plant Physiol.* doi:  
683 10.1104/pp.114.247205
- 684 **Stacey MG, Cahoon RE, Nguyen HT, Cui Y, Sato S, Nguyen CT, Phoka N, Clark KM, Liang Y,**  
685 **Forrester J, et al** (2016) Identification of homogentisate dioxygenase as a target for vitamin E  
686 biofortification in oilseeds. *Plant Physiol* **172**: 1506–1518
- 687 **Starker CG, Parra-Colmenares AL, Smith L, Mitra RM, Long SR** (2006) Nitrogen fixation mutants  
688 of *Medicago truncatula* fail to support plant and bacterial symbiotic gene expression. *Plant*  
689 *Physiol* **140**: 671–680
- 690 **Strack D, Vogt T, Schliemann W** (2003) Recent advances in betalain research. *Phytochemistry* **62**:  
691 247–69
- 692 **Streeter J, Wong PP** (1988) Inhibition of legume nodule formation and N<sub>2</sub> fixation by nitrate. *Crit Rev*  
693 *Plant Sci* **7**: 1–23
- 694 **Tadege M, Wen J, He J, Tu H, Kwak Y, Eschstruth A, Cayrel A, Endre G, Zhao PX, Chabaud M, et**  
695 **al** (2008) Large-scale insertional mutagenesis using the *Tnt1* retrotransposon in the model legume  
696 *Medicago truncatula*. *Plant J Cell Mol Biol* **54**: 335–47
- 697 **Tzin V, Galili G** (2010) New insights into the shikimate and aromatic amino acids biosynthesis pathways  
698 in plants. *Mol Plant* **3**: 956–72
- 699 **Van de Velde W, Guerra JCP, De Keyser A, De Rycke R, Rombauts S, Maunoury N, Mergaert P,**  
700 **Kondorosi E, Holsters M, Goormachtig S** (2006) Aging in legume symbiosis. A molecular view  
701 on nodule senescence in *Medicago truncatula*. *Plant Physiol* **141**: 711–720
- 702 **Wang M, Toda K, Block A, Maeda HA** (2019) TAT1 and TAT2 tyrosine aminotransferases have both  
703 distinct and shared functions in tyrosine metabolism and degradation in *Arabidopsis thaliana*. *J*  
704 *Biol Chem* **294**: 3563–3576
- 705 **Wang M, Toda K, Maeda HA** (2016) Biochemical properties and subcellular localization of tyrosine  
706 aminotransferases in *Arabidopsis thaliana*. *Phytochemistry* **132**: 16–25
- 707 **Weng J-K, Philippe RN, Noel JP** (2012) The rise of chemodiversity in plants. *Science* **336**: 1667–1670
- 708 **Westfall CS, Xu A, Jez JM** (2014) Structural evolution of differential amino acid effector regulation in  
709 plant chorismate mutases. *J Biol Chem* **289**: 28619–28628

- 710 **Wych RD, Rains DW** (1978) Simultaneous measurement of nitrogen fixation estimated by  
711 acetylene-ethylene assay and nitrate absorption by soybeans. *Plant Physiol* **62**: 443–448
- 712 **Xi J, Chen Y, Nakashima J, Wang S, Chen R** (2013) *Medicago truncatula esn1* defines a genetic locus  
713 involved in nodule senescence and symbiotic nitrogen fixation. *Mol Plant Microbe Interact* **26**:  
714 893–902
- 715 **Xing A, Last RL** (2017) A regulatory hierarchy of the Arabidopsis branched-chain amino acid metabolic  
716 network. *Plant Cell* **29**: 1480–1499
- 717 **Yoo H, Widhalm JR, Qian Y, Maeda H, Cooper BR, Jannasch AS, Gonda I, Lewinsohn E, Rhodes**  
718 **D, Dudareva N** (2013) An alternative pathway contributes to phenylalanine biosynthesis in plants  
719 via a cytosolic tyrosine:phenylpyruvate aminotransferase. *Nat Commun* **4**: 1–11
- 720 **Zhao J, Williams CC, Last RL** (1998) Induction of Arabidopsis tryptophan pathway enzymes and  
721 camalexin by amino acid starvation, oxidative stress, and an abiotic elicitor. *Plant Cell* **10**:  
722 359–370
- 723

724 **MATERIALS AND METHODS:**

725 *Plant Materials and Growth Conditions*

726 *Medicago truncatula* seeds were scarified in concentrated hydrochloric acid for eight minutes  
727 and repeatedly washed with water. Seeds were then surface sterilized with bleach for 1.5 minutes  
728 followed by repeated water washes. Seeds were placed in sterile water for 16 hours at 4°C and  
729 then transferred to germination media (0.5x MS media, 0.8% agar, 1 μM GA<sub>3</sub>, pH 7.6), wrapped  
730 in aluminum foil and placed at 4°C. After 48 hours plates with sterilized seeds were moved to  
731 22°C. After 24 hours the aluminum foil was removed and the germinated seedlings were  
732 transferred to standard potting soil and placed in a growth chamber (Conviron). Pots were  
733 watered with 1x Hoaglands solution when dry, and grown under 12 hour light:dark cycles with  
734 200 μE light intensity and ~60% humidity.

735 *Genotyping*

736 A single young leaf from 6-week-old plants was placed in 1.7 mL microcentrifuge tube with 600  
737 μL of DNA extraction buffer (10 mM Tris-HCl pH 8.0, 25 mM ethylenediaminetetraacetic acid  
738 (EDTA), and 0.5% SDS), pulverized with a mini blue pestle, and incubated at 55°C for 15  
739 minutes. The solution was cooled to room temperature and 200 μL of 5 M ammonium acetate  
740 was added, vortexed for 20 seconds and centrifuged at 14,000 g for 3 minutes. The supernatant  
741 was transferred to a fresh tube and 600 μL of isopropanol was added, followed by centrifugation

742 at 14,000 g for 1 minute. The supernatant was decanted and the pellet washed with 400  $\mu$ L of  
743 70% ethanol followed by centrifugation at 14,000 g for 1 minute. The supernatant was decanted  
744 and the pellet dried for 1 hour in a sterile hood. The resulting DNA was dissolved in 50  $\mu$ L of  
745 H<sub>2</sub>O. Genotyping PCR reactions contained 1  $\mu$ M gene and insertion specific primers  
746 (**Supplementary Table 2**), 1x EconoTaq PLUS master mix (Lucigen), and genomic DNA. DNA  
747 was amplified in a thermocycler with the following conditions: an initial denaturation at 95°C for  
748 5 min, 35 cycles of amplification at 95°C for 20 s, 60–65°C for 20 s, 72°C for 60 s, with a final  
749 extension at 72°C for 5 min.

#### 750 *Quantitative reverse transcription PCR (qRT-PCR)*

751 RNA was extracted from leaves of 6-week-old plants. About 50mg of tissue was pulverized in  
752 liquid N<sub>2</sub> using a mini pestle. RNA extraction buffer (68mM sodium citrate, 132mM citric acid,  
753 1mM EDTA and 2% SDS) was added and vortexed immediately for 10 seconds, the tubes were  
754 then placed on their sides for 5 minutes at 22°C. The solution was centrifuged at 12,000g for 2  
755 minutes and 400  $\mu$ L of the supernatant was transferred to a fresh tube. 100  $\mu$ L of 1M NaCl was  
756 added and mixed by pipetting, followed by addition of 300  $\mu$ L of chloroform, inverted multiple  
757 times and centrifuged at 4°C for 10 minutes at 12,000g. The upper phase was transferred to a new  
758 tube and an equal volume of isopropanol was added, mixed by inverting and placed at 4°C for 10  
759 minutes. The solution was then centrifuged at 4°C for 10 minutes at 12,000g and the supernatant

760 decanted. The pellet was washed with 70% ethanol, followed by centrifugation for 3 minutes at  
761 12,000g and the supernatant decanted and the pellet dried in a sterile hood until all residual  
762 ethanol was evaporated. The resulting pellet was redissolved in 25  $\mu$ L of nuclease free H<sub>2</sub>O  
763 (Promega). To remove DNA, the RNA solution was treated with DNase (Turbo DNase, Fisher)  
764 following the manufacturer's protocol. The remaining RNA was quantified using a nano-drop  
765 spectrophotometer (Thermo) and diluted to a 20 ng/ $\mu$ L concentration. RNA was converted into  
766 cDNA using reverse transcriptase (Applied biosystems) with an oligo d(T) primer.

767 For qPCR, cDNA was diluted to 5 ng/ $\mu$ L and additional 5-fold dilutions were made to  
768 calculate primer efficiency. All primer pair efficiencies were between 90-100%. cDNA was  
769 mixed with GoTaq qPCR master mix (Promega) containing SYBR green and 300 nM of each  
770 primer. Reactions were placed in an Stratagene Mx3000P (Agilent) thermocycler using the  
771 following PCR cycle an initial denaturation at 95°C for 10 min, 45 cycles of amplification at  
772 95°C for 15 s, 60°C for 30 s, 72°C for 30 s.

773 For relative quantification, Ct values were extracted for each reaction and used to  
774 quantify initial cDNA concentration using  $2^{-\Delta\Delta C(t)}$  method normalized to a housekeeping gene  
775 (*MtPI4K* Kryvoruchko et al., 2016, **Supplementary Table 2**) using the LinRegPCR program  
776 (Ruijter et al., 2013). For absolute quantification, pET28a vectors carrying *MtPDH1*, *MtncADH*  
777 and *MtADH* were used as the template to amplify a fragment of the corresponding genes. The

778 resulting fragments were purified from 0.8% agarose gels using a QIAquick gel extraction kit  
779 (Qiagen) following manufacturer's protocol. The DNA concentration was quantified and repeated  
780 5-fold dilutions were made and used to obtain a standard curve in qRT-PCR with gene-specific  
781 primers (**Supplementary Table 2**). Ct values were extracted for each qRT-PCR reaction and used  
782 to quantify initial cDNA concentration by using the linear range created as above for the  
783 respective gene.

#### 784 *Enzyme extraction and ADH and PDH assays*

785 Leaf tissue from 6-week-old plants were ground to a fine powder in a prechilled mortar and  
786 pestle under liquid N<sub>2</sub>. Extraction buffer (25 mM HEPES, pH 7, 50 mM KCl, 10% ethylene  
787 glycol, 1% polyvinylpyrrolidone (PVP) and 1 mM dithiothreitol (DTT)) was added in a 1:3 ratio  
788 of tissue to buffer (w/v). The slurry was centrifuged for 20 min at 4°C, at 20,000 g and the  
789 resulting supernatant desalted using a gel filtration column (Sephadex G50-80 resin,  
790 Sigma-Aldrich) equilibrated with extraction buffer without DTT and PVP. Protein concentrations  
791 were determined by a Bradford assay (Bio-Rad Protein Assay, Bio-Rad).

792 The desalted crude enzyme extracts were used in ADH and PDH reactions that  
793 contained 25 mM HEPES (pH 7.5), 50 mM KCl, 10% ethylene glycol, 1 mM NADP<sup>+</sup>, 1 mM  
794 substrate (L-arogenate or prephenate, respectively). Arogenate was prepared by enzymatic  
795 conversion from prephenate (Sigma-Aldrich), as previously reported (Maeda et al., 2011).

796 Reactions were initiated by addition of enzyme from various sources and incubated at 37°C for  
797 45 minutes. The resulting assays were injected into HPLC equipped with a ZORBAX SB-C18  
798 column (Agilent) to directly detect the final product of the assay as described previously  
799 (Schenck et al., 2015).

800 For PDH and ADH activities from various legumes (**Supplementary Fig. 9**), leaf  
801 material was obtained from the University of Wisconsin-Madison Botany Department  
802 greenhouse or from identified trees on campus. Plants were grown under varying light and  
803 temperature conditions and leaf material was collected at different developmental stages. Enzyme  
804 extractions and ADH and PDH assays were performed as described above.

#### 805 ***Metabolite extraction and detection***

806 Tissue from 6-week-old plants was added into 1.7 mL microcentrifuge tubes with 400 µL of  
807 extraction buffer (2:1 (v/v) methanol:chloroform, 0.01 % butylated hydroxytoluene (BHT), 100  
808 µM norvaline and 1.25 µg/mL tocol as previously described (Collakova and DellaPenna, 2003),  
809 with 3 glass beads (3 mm). Samples were vigorously shaken for 3 minutes at 1000 r.p.m. using a  
810 genogrinder (MiniG 1600, SPEX SamplePrep). Additional chloroform (125 µL) and water (300  
811 µL) were added and vortexed for 30 seconds. Samples were centrifuged for 10 minutes at 20,000  
812 rpm and the polar and non-polar phases were transferred to new tubes and dried using a vacuum  
813 concentrator (Labconco).

814 For tocopherol analysis, the dried nonpolar phase was resuspended in methanol with  
815 0.01% BHT. Samples were injected into a HPLC (Agilent 1260) equipped with a ZORBAX  
816 SB-C18 column (Agilent) using a 30 minute isocratic elution of 95 % methanol, 5 % water.  
817 Tocopherols in the extractions were visualized using fluorescence detection excitation at 290 nm  
818 and emission at 330 nm and compared with authentic standards (Sigma) and normalized to an  
819 internal control (tocol).

820 For anthocyanin detection, 1 M HCl of methanol was added to the polar phase in a 1:1  
821 ratio. A spectrophotometer was used to measure absorbance at 520 nm. Absolute levels were  
822 estimated using an extinction coefficient of anthocyanin absorbance (Lee et al., 2005) of 33,000  
823  $L \times M^{-1} \times cm^{-1}$ .

824 The polar and non-polar phases were analyzed with GC-MS. The dried polar phase was  
825 redissolved in pyridine with 15.0 mg/mL methoxyamine-HCl. Samples were vortexed for 30  
826 seconds followed by sonication for 10 minutes and incubated for 60 minutes at 60°C. This was  
827 repeated once more, then the samples were derivatized with an equal volume of  
828 *N*-methyl-*N*-(*tert*-butyldimethylsilyl)trifluoroacetamide + 0.1 % *tert*-butyldimethylchlorosilane  
829 (MTBSTFA + 0.01 % *t*-BDMCS, Sigma-Aldrich) and incubated for 60 minutes at 60°C. Samples  
830 were then injected into GC-MS (Trace 1310, ISQ LT, Thermo Scientific). The dried non-polar  
831 phase was redissolved in 800  $\mu$ L of chloroform with 50 ppm BHT and 500  $\mu$ L of 1.25M HCl in



832 methanol. Following incubation at 50°C for 4 hours, samples were completely dried under  
833 nitrogen gas. The dried non-polar phase was resuspended in 70 µL of pyridine and derivatized  
834 with 30 µL of MTBSTFA + 0.01 % t-BDMCS (Sigma-Aldrich). Following transfer to a glass  
835 vial, 1 µL of the polar and non-polar phases were injected onto a 30 m column (TG-5MS,  
836 Thermo Scientific) using a 10:1 split ratio, and an oven ramp method of 5°C per minute for 46  
837 minutes and held at 300°C for 10 minutes. Detected compounds were compared with library  
838 matches from NIST and peak areas based on ion abundance were normalized to an internal  
839 standard (norvaline).

#### 840 *Acetylene reduction assay (ARA)*

841 Plants used for ARA were scarified and germinated as described previously. Seedlings were  
842 transferred to 12” square plates containing modified solid Fahræus medium supplemented with  
843 0.5 mM NH<sub>4</sub>NO<sub>3</sub> (Catoira et al., 2000). Plates were grown under the same conditions as pot  
844 grown plants, however plates were placed at a ~60° angle so that the roots would not penetrate  
845 the agar. After 5 days of growth on plates, each plant was inoculated with 1 mL of water  
846 containing *Sinorhizobium meliloti* Rm1021 at an OD<sub>600</sub> 0.02. Plants were then allowed to grow  
847 for 14, 21 and 28 dpi at which point nodules were counted and plants were moved to 10 mL glass  
848 jars with 1 mL of sterile water at the bottom. Glass jars were sealed with a rubber stopper, then  
849 injected with 1 mL of acetylene gas (10% acetylene final). After 48 hours of incubation at 37°C,

850 1 mL of the gas from the glass jars was injected into a gas chromatograph (GC-2010, Shimadzu)  
851 to measure the production of ethylene and and ARA activity was calculated as described in Hardy  
852 et al., 1968.

### 853 ***Histochemical staining of lignin composition***

854 For cell wall composition staining, thin cross sections of stem tissue from 6-week-old plants were  
855 prepared using a razor blade. For Mäule staining stem sections were placed in a 1% potassium  
856 permanganate solution for 5 minutes, then rinsed with water followed by addition of a 12% HCl  
857 (V/V) for 5 minutes and rinsed again with water. A 1.5% solution of sodium bicarbonate was  
858 added to facilitate a color change to dark red and visualized using an epifluorescence microscope  
859 (Olympus BX60).

860 For phloroglucinol staining, similar stem cross sections were placed in a well plate with  
861 1 mL of 10 % phloroglucinol (w/v) solution in 95 % ethanol with 500  $\mu$ L of 10 N HCl and  
862 incubated for 5 minutes. Stem sections were transferred to a glass slide and washed with water  
863 and visualized using a epifluorescence microscope (Olympus BX60).

864 GUS staining was performed on nodules developed after inoculation with *S. meliloti*  
865 Rm1021 carrying a *PnifH::UidA* fusion, to localize expression of the bacterial *nifH* gene, which  
866 is required for nitrogen fixation. Nodules were embedded in 4% agarose and 50-100  $\mu$ M sections  
867 were made with a vibratome<sup>®</sup> 1000 plus (Leica). Sections were immersed in a staining solution

868 (2.5% 5-Bromo-4-chloro-3-indoxyl-beta-D-glucuronic (X-Gluc), 0.2M sodium phosphate buffer  
869 (pH 7), 0.1 M potassium ferricyanide, 0.1 M potassium ferrocyanide, 0.25 M Na<sub>2</sub>EDTA, and  
870 10% Triton X-100) and vacuum infiltrated for 10 minutes, incubated in the dark at 37°C for 30  
871 minutes, and rinsed with phosphate buffer. Sections were visualized using bright field  
872 microscopy.  
873

874 **SUPPLEMENTARY RESULTS:**

875 **Supplementary Table 1. Non-targeted metabolite analysis from leaf tissue of Wt and**

876 ***mtpdh1-1***

877

| <b>Metabolite</b>       | <b>retention time (min)</b> | <b>Ion (m/z)</b> | <b>pdh1-1/R108</b> | <b>pdh1-2/R108</b> | <b>T-test pdh1-1: R108</b> | <b>T-test pdh1-2:R108</b> |
|-------------------------|-----------------------------|------------------|--------------------|--------------------|----------------------------|---------------------------|
| <b>Beta-Alanine</b>     | 21.5809                     | 248.1            | NS                 | 1.49638            | NS                         | 0.04629                   |
| <b>beta-D-glucoside</b> | 32.1517                     | 204.1            | 1.18350            | 2.20999            | 0.01116                    | 0.00016                   |
| <b>Citric Acid</b>      | 30.5877                     | 273.1            | NS                 | 1.51560            | NS                         | 0.00027                   |
| <b>D-(+)-Melibiose</b>  | 43.5201                     | 204.1            | 0.72128            | NS                 | 0.03323                    | NS                        |
| <b>Ferulic Acid</b>     | 36.1830                     | 338.2            | NS                 | 0.51230            | NS                         | 0.01121                   |
| <b>Gentisic Acid</b>    | 29.4116                     | 355.2            | NS                 | 2.85714            | NS                         | 0.00001                   |
| <b>Glucuronic Acid</b>  | 29.1234                     | 292.2            | NS                 | 1.58440            | NS                         | 0.00001                   |
| <b>Glycolic Acid</b>    | 11.8422                     | 205.1            | 1.42874            | 1.92904            | 0.01487                    | 0.00037                   |
| <b>L-Alanine</b>        | 19.8168                     | 188.1            | NS                 | 2.39806            | NS                         | 0.00005                   |
| <b>Lauryl Alcohol</b>   | 22.0027                     | 243.1            | 1.27167            | NS                 | 0.01445                    | NS                        |
| <b>Maleic Acid</b>      | 18.2630                     | 245.0            | NS                 | 0.68722            | NS                         | 0.04895                   |
| <b>Malic Acid</b>       | 23.0106                     | 233.1            | NS                 | 0.73291            | NS                         | 0.04836                   |
| <b>Malonic Acid</b>     | 15.4680                     | 233.1            | 0.75424            | NS                 | 0.02370                    | NS                        |
| <b>Pinitol</b>          | 30.8088                     | 260.2            | 1.33875            | NS                 | 0.01147                    | NS                        |
| <b>Propionic Acid</b>   | 18.8585                     | 292.2            | NS                 | 2.08458            | NS                         | 0.01253                   |
| <b>Saccharic Acid</b>   | 35.0341                     | 333.2            | 0.74697            | 1.32846            | 0.00476                    | 0.00815                   |
| <b>Sucrose</b>          | 44.9165                     | 361.2            | NS                 | 1.99803            | NS                         | 0.02979                   |
| <b>Tartaric Acid</b>    | 25.6516                     | 305.2            | 1.43056            | NS                 | 0.03744                    | NS                        |
| <b>Trehalose</b>        | 43.9602                     | 361.2            | NS                 | 18.99309           | NS                         | 0.00048                   |
| <b>Tyramine</b>         | 32.7431                     | 174.1            | NS                 | 0.59383            | NS                         | 0.00075                   |
| <b>Unknown</b>          | 33.6590                     | 204.1            | 1.26433            | NS                 | 0.00363                    | NS                        |
| <b>Unknown</b>          | 17.5759                     | 186.0            | 1.79713            | 2.62694            | 0.00452                    | 0.01497                   |
| <b>Unknown</b>          | 13.6890                     | 220.1            | 1.41853            | NS                 | 0.00884                    | NS                        |
| <b>Unknown</b>          | 30.8657                     | 217.1            | 1.32711            | NS                 | 0.00953                    | NS                        |
| <b>Unknown</b>          | 9.2975                      | 184.1            | 1.52453            | NS                 | 0.01137                    | NS                        |
| <b>Unknown</b>          | 47.8363                     | 204.2            | 1.43690            | 1.35843            | 0.01504                    | 0.04118                   |
| <b>Unknown</b>          | 47.2028                     | 204.1            | 1.21975            | 1.20442            | 0.03006                    | 0.04871                   |
| <b>Unknown</b>          | 32.5721                     | 221.2            | 1.21109            | NS                 | 0.03112                    | NS                        |
| <b>Unknown</b>          | 49.3385                     | 217.1            | 1.31458            | 1.40117            | 0.03151                    | 0.01702                   |
| <b>Unknown</b>          | 36.3824                     | 434.3            | 0.70531            | NS                 | 0.03570                    | NS                        |
| <b>Unknown</b>          | 21.0322                     | 189.1            | 1.20140            | NS                 | 0.04070                    | NS                        |
| <b>Unknown</b>          | 23.6949                     | 217.1            | NS                 | 3.31769            | NS                         | 0.00007                   |
| <b>Unknown</b>          | 32.7980                     | 205.1            | NS                 | 3.21406            | NS                         | 0.00002                   |
| <b>Unknown</b>          | 27.4875                     | 422.2            | NS                 | 3.08602            | NS                         | 0.01943                   |
| <b>Unknown</b>          | 17.5759                     | 186.0            | NS                 | 2.48604            | NS                         | 0.01419                   |
| <b>Unknown</b>          | 24.6017                     | 217.1            | NS                 | 2.38962            | NS                         | 0.00001                   |
| <b>Unknown</b>          | 22.0509                     | 307.2            | NS                 | 2.33226            | NS                         | 0.00220                   |
| <b>Unknown</b>          | 19.1101                     | 184.1            | NS                 | 2.02055            | NS                         | 0.04568                   |
| <b>Unknown</b>          | 30.6073                     | 150.1            | NS                 | 1.50572            | NS                         | 0.00020                   |

|                |         |       |    |         |    |         |
|----------------|---------|-------|----|---------|----|---------|
| <b>Unknown</b> | 24.9767 | 313.3 | NS | 1.43477 | NS | 0.04725 |
| <b>Unknown</b> | 31.7135 | 275.2 | NS | 1.31801 | NS | 0.00069 |
| <b>Unknown</b> | 38.4361 | 331.1 | NS | 1.27114 | NS | 0.00650 |
| <b>Unknown</b> | 33.7685 | 270.2 | NS | 0.76019 | NS | 0.03895 |
| <b>Unknown</b> | 41.0710 | 274.1 | NS | 0.70608 | NS | 0.01860 |
| <b>Unknown</b> | 37.2316 | 204.1 | NS | 0.67959 | NS | 0.02482 |
| <b>Unknown</b> | 25.7858 | 331.2 | NS | 0.65537 | NS | 0.01843 |
| <b>Unknown</b> | 31.0367 | 292.2 | NS | 0.54155 | NS | 0.00025 |
| <b>Xylose</b>  | 26.8968 | 160.1 | NS | 0.60672 | NS | 0.00493 |

886

887

888 Only compounds are shown that were significantly different from Wt with abundance > 1.2 or <

889 0.8 fold-change and a P-value  $\leq 0.05$ . Ratio of average relative metabolite abundance is shown

890 for *pdh1-1* and *pdh1-2* compared with Wt with N = 5. NS, not significant. Unknowns are

891 compounds that were detected with unique ions, but did not have a confident library match (<

892 75%).

893

894

895 **Supplementary Table 2. Primer sequences used in this study.**

| 896 | <b>Name</b>          | <b>Use</b>                               | <b>Sequence (5'-3')</b>   |
|-----|----------------------|------------------------------------------|---------------------------|
| 897 | PDH1-1               | <i>mtpdh1-1</i> genotyping               | GAGCACTATTTCCATTGTAAAC    |
| 898 | Tnt1R                | <i>mtpdh1-1</i> genotyping               | CAGTGAACGAGCAGAACCTG      |
| 899 | PDH1-2               | <i>mtpdh1-2</i> genotyping               | ATGAGACTGGAGGGGGAGAT      |
| 900 | Tnt1F                | <i>mtpdh1-1</i> genotyping               | GAACATATGGCAGGGGTTACAAG   |
| 901 | MtPDHqF1             | <i>mtpdh1-1</i> qPCR                     | AAACAAGGTCATACTCTAACTGCAA |
| 902 | MtPDHqR1             | <i>mtpdh1-1</i> qPCR                     | CAGCATCAAGGAATGCTGTAA     |
| 903 | MtPDHqF2             | <i>mtpdh1-2</i> qPCR                     | CAACAGATTCCGCCAGACAAGAGC  |
| 904 | MtPDHqR2             | <i>mtpdh1-2</i> qPCR                     | CTGGGTTCTGTCCTTCATCGA     |
| 905 | MtADHqF              | <i>MtADH</i> (Medtr4g115980) qPCR        | GACCTGAGAGTGGAAAGCAGT     |
| 906 | MtADHqR              | <i>MtADH</i> (Medtr4g115980) qPCR        | TTCTCACACCTCGAAACCCT      |
| 907 | MtncADHqF            | <i>MtncADH</i> (Medtr5g083530) qPCR      | GCTAGTGAGGGTTGTAAGATGC    |
| 908 | MtncADHqR            | <i>MtncADH</i> (Medtr5g083530) qPCR      | GCGGGTAATTCTGTATTATT      |
| 909 | MtPI4KF <sup>1</sup> | housekeeping gene ( <i>MtPI4K</i> ) qPCR | GCAGATAGACACGCTGGGA       |
| 910 | MtPI4KR <sup>1</sup> | housekeeping gene ( <i>MtPI4K</i> ) qPCR | AACTCTTGGGCAGGCAATAA      |
| 911 | MtHPPD1F             | <i>MtHPPD1</i> (Medtr5g091060) qPCR      | CCCACCAACACCACTTCTCT      |
| 912 | MtHPPD1R             | <i>MtHPPD1</i> (Medtr5g091060) qPCR      | GGTGCTGGGTTACAGCATTT      |
| 913 | MtHGOF               | <i>MtHGO</i> (Medtr8g463280) qPCR        | AGGCACGGGTTCCCTTCTAAT     |
| 914 | MtHGOR               | <i>MtHGO</i> (Medtr8g463280) qPCR        | TCAATGAAATCCGTTGGTGA      |
| 915 | MtMAAIF              | <i>MtMAAI</i> (Medtr4g134370) qPCR       | CTTCCATGGGTCCAGAGTGT      |
| 916 | MtMAAIR              | <i>MtMAAI</i> (Medtr4g134370) qPCR       | CCGCCATGAAAACCTTCATCT     |
| 917 | MtFAHF               | <i>MtFAH</i> (Medtr2g025640) qPCR        | ACTTCGGACCCACATTGAAG      |
| 918 | MtFAHR               | <i>MtFAH</i> (Medtr2g025640) qPCR        | TCCACAGGTTTTCCCAGTTC      |
| 919 | MtVPEF <sup>2</sup>  | <i>MtVPE</i> (Medtr1g016780) qPCR        | AGTTCTGCCTGTTGTGGAATGTC   |
| 920 | MtVPER <sup>2</sup>  | <i>MtVPE</i> (Medtr1g016780) qPCR        | GGTAGCTCCTGTCTGCCAATTAC   |

921

922 <sup>1</sup> Housekeeping gene (Kryvoruchko et al., 2016) used in normalization of qPCR data.

923 <sup>2</sup> Cysteine protease (vacuolar processing enzyme; VPE) that serves as a senescence marker gene

924 (Pérez Guerra et al., 2010).

925
